Title -

Correlation between the environmental parameters with outbreak pattern of COVID-19: A district level investigation based on yearlong period in India

Authors –

Amitesh Gupta<sup>1\*</sup>, Laboni Saha<sup>3</sup>

<sup>1</sup> RBased Services Private Limited, New Delhi, India.

<sup>2</sup> RBased Services Private Limited, New Delhi, India.

<sup>3</sup> Savitribai Phule Pune University, Pune, India.

\*Corresponding Author - Amitesh Gupta

Abstract –

The present study has investigated the role of regional meteorology and air quality parameters in the outbreak pattern of COVID-19 pandemic in India. Using the remote sensing based dataset of 12 environmental variables we correlated infective case counts at a district level in India. Our investigation carried out on the circumstantial data from more than 300 major affected districts in India and found that air quality parameters are playing very crucial role in this outbreak. Among the air pollutants, O<sub>3</sub> was better correlating with infection counts followed by AOD, CO, NO<sub>2</sub>, BC and SO<sub>2</sub>. We also observed that among the weather parameters air temperature, incoming shortwave radiation, wind speed are positively and significantly associate with outbreak pattern and precipitation and humidity are negatively correlated with confirmed cases; only cloud cover has no significant relation. We noted that coastal districts in the both coast of India and districts located in the plain and low-lying areas have experienced bitter situation during this pandemic. Our study suggests that improving air quality with proper strict regulations and complete lockdown during the peak of pandemic could reduce the misfortune in all over India.

Keywords –

COVID-19; air quality; meteorology; India

# 1 Introduction

2 In the 21st century, the world has been battle-scarred by the pernicious ordeal of coronavirus  
3 disease (COVID-19) since early 2020. By the end of March, 2021, a total of 152,006,071  
4 confirmed cases with a death toll of 3,193,315 have been registered all over the world  
5 (<https://www.worldometers.info/coronavirus/>). This pneumonia infection caused by Severe  
6 Acute Respiratory Syndrome CoronaVirus-2 (SARS-CoV-2) had initially broken out in  
7 Wuhan, Hubei province, China during late 2019 (Guan et al., 2020; Liu et al., 2020a; Wu and  
8 McGoogan, 2020; Zhu et al., 2020a; Zu et al., 2020) and gradually spread all over the world  
9 (Bertuzzo et al., 2020; Gorbalenya et al., 2020). Contemplating the hasty unfurl of this virus  
10 and its human-to-human transmissibility from contagion (Wang et al., 2020a; Wang et al.,  
11 2020b; Wang et al., 2020c), the World Health Organization (WHO) declared this disease to  
12 be a global pandemic on March 11, 2020. India, the domicile of 17.7% of the total world  
13 population had noted its very first COVID-19 confirmed case on January 27, 2020, and  
14 afterwards a total of 12,220,717 cases have been confirmed by the end of March, 2021 with a  
15 death count of 162,960 (<https://www.covid19india.org/>).

16 Worldwide sundry clinical inspections of COVID-19 have diagnosed respiratory droplets and  
17 fomites from contaminated persons as the spawn agent of this lethal disease (Alag, 2020; Ge  
18 et al., 2013; Huang et al., 2020a; Jana et al., 2020; Jung et al., 2021; Kunz et al., 2020;  
19 Sathian et al., 2020; Tuttle, 2020). Umpteen researchers also reported about analogous  
20 symptoms of this disease to MERS and SARS (Holshue et al., 2020; Perlman, 2020; Tan et  
21 al., 2005; Wang et al., 2020c). Since the SARS-CoV-2 virus initially causes respiratory  
22 damage and this disease has very close similarities to the influenza in terms of various  
23 symptoms like Fever, Cytokine storm syndrome, diffuse alveolar damage, Lymphopenia,  
24 Coagulation, and immunocompromised conditions (Harapan et al., 2020; Khorramdelazad et  
25 al., 2021; Larsen et al., 2020; Li et al., 2021), a few researchers have already exhorted about  
26 significant association of environmental parameters to COVID-19 transmission (Azuma et  
27 al., 2020; Bherwani et al., 2020; Eslami and Jalili, 2020; Gupta and Pradhan, 2020a; Kifer et  
28 al., 2021; Rume and Islam, 2020; Saadat et al., 2020; Shakil et al., 2020). Mention Worthy,  
29 earlier shedload of studies have conjectured about conspicuous impact of weather conditions  
30 on dissemination of respiratory viruses and its seasonality (D'Amato et al., 2018; Pica and  
31 Bouvier, 2012; Price et al., 2019). There are also a few global as well as regional studies that  
32 had been carried out in the context of China, USA, England, Germany, Spain, Italy,  
33 Indonesia, Iran, Pakistan, Bangladesh, India, and found significant correlation between  
34 weather parameters and the COVID-19 cases (Ahmadi et al., 2020; Chen et al., 2021; Fadli et  
35 al., 2020; Ficaretola and Rubolini, 2021; Gupta et al., 2020a; Gupta and Pradhan, 2020b; Islam  
36 et al., 2020; Liu et al., 2020b; Ma et al., 2020; Mehmood et al., 2021; Nottmeyer and Sera,  
37 2021; Oliveiros et al., 2020; Qi et al., 2020; Tosepu et al., 2020). On a contrary, a few studies  
38 have also reported that meteorological observations are not significantly associated with the  
39 outbreak pattern (Iqbal et al., 2020; Jahangiri et al., 2020; Jamil et al., 2020; Mollalo et al.,  
40 2020; Shi et al., 2020; Xie and Zhu, 2020). Studies carried out by Bochenek et al., 2021;  
41 Borah et al., 2020; Briz-Redón and Serrano-Aroca, 2020; Emediegwu, 2021; Guo et al.,  
42 2021; Gupta et al., 2020b; Mecenas et al., 2020; Runkle et al., 2020; Şahin, 2020; Sil and  
43 Kumar, 2020 suggested that warm and humid condition seem to foreshorten the proliferation

of COVID-19. On the other hand, (Al-Rousan and Al-Najjar, 2020; Awasthi et al., 2020; Bashir et al., 2020a; Fawad et al., 2021; Gupta and Pradhan, 2020a; Kumar and Kumar, 2020; Pani et al., 2020; Sangkham et al., 2021; Selcuk et al., 2021; Sharma et al., 2021) reported that hotter days might be more susceptible for COVID-19 dissemination while the role of humidity was still incongruous (Aidoo et al., 2021; Auler et al., 2020; Gupta et al., 2020c; Kumar, 2020; Yuan et al., 2021). Menebo, 2020 found negative association between precipitation and COVID-19 cases, contrary to Byass, 2020; while Gunthe et al., 2020 found no significance of precipitation and cloudiness for this outbreak.

Studies have enunciated that frequent short-term exposure to air pollutants could aggrandize the likelihood of symptomatic acute respiratory infections among adults (Kim et al., 2018; Kirwa et al., 2021; Xing et al., 2016). Chauhan and Johnston, 2003; Zhang et al., 2019a had reported that moderate and long-term exposure to imprudent volume of the oxidant air pollutants like Ozone ( $O_3$ ), Nitrogen di-Oxide ( $NO_2$ ) have the potential to exacerbate the inflammatory effects of the viral and bacterial respiratory infections. Insufflating such air with prohibitive concentration of Particulate Matters (PM) and Carbon Monoxide (CO) have been also inculpated for escalating the risk of cardiovascular and respiratory diseases, and contributing to the mortality rate inclusively (Huang et al., 2018; Khaniabadi et al., 2017; Liu et al., 2018; Yang et al., 2020a). Recent studies have stated that both short-term and long-term exposure to different air pollutants including PM ( $PM_{2.5}$ ,  $PM_{10}$ ), Sulphur di-Oxide ( $SO_2$ ), CO,  $O_3$  and  $NO_2$  could contribute significantly to the higher rates of COVID-19 infections in different parts of the world (Ali and Islam, 2020; Bourdrel et al., 2021; Coker et al., 2020; Gujral and Sinha, 2021; Jain et al., 2021; Li et al., 2020; Lin et al., 2020; Ma et al., 2021; Matthew et al., 2021; Mele et al., 2021; Sharma et al., 2021; Suhaimi et al., 2020; Wu et al., 2020), therefore positively associated with the conveyance of COVID-19.  $O_3$  is also a salient precursor of hydroxyl radical (OH), thus it also entices the concentration of  $SO_2$  and CO (Logan et al., 1981; Thompson, 1992). On the other hand, the carbonaceous pollutants i.e. CO and BC and OC, which also includes the primary and secondary organic carbon, are mainly produced during different anthropogenic activities of biomass burning and fossil fuel combustion, with relatively little contribution from various natural sources (Li et al., 2016; Prabhu et al., 2020; Schmidt, 2011; Wang et al., 2019; Winiger et al., 2016; Zhang and Wang, 2011). Though the source mechanism of these carbonaceous agents are presumably analogous, its spatial concentration differs due to the complex physio-chemical transformation in wayward meteorology (Saliba et al., 2010; Vautard et al., 2007). AOD, an illustrious indicant of Particulate Matter pollution (Chudnovsky et al., 2014; Engel-Cox et al., 2004; Gupta et al., 2021; Karimian et al., 2016), accounts columnar concentration of gaseous and liquid airborne particles has not been often related to such malady study. Since the significant relation between prevailing weather conditions and regional pollution level is well demonstrated by various studies, it becomes very crucial to behold the role of meteorology and air quality togetherly to conceive the seasonality of such savage seizure of coronavirus.

Scanty studies have been carried out on the importance of freshen air for the melioration of human health and to elude any convalescence (Cragg et al., 2016; Kampa and Castanas, 2008; Manisalidis et al., 2020; White et al., 2019). Likewise, scarcely any study has been fanatical about the significance of weather parameters on COVID-19 recovery, even though

93.88% of the sufferers have been healed in India, slightly lesser than the global recovery rate (97.42%) till March 31, 2021. Since a handful of studies had reckoned that the inferior air quality had efficaciously swayed to aggravate the COVID-19 emanation, hence it becomes also requisite to investigate whether the convivial air quality has been benevolent to convalesce the COVID-19 patients in India. Till date, seldom study might have inspected the yearlong period of pandemic situation while minimal have rendered any estimation on this. Therefore, the present study has been firmed to analyse the association of COVID-19 incidences (i.e. transmission) and recovery cases with weather and air quality parameters across the country, as well as proffered a comparative assessment for estimating confirm and recovery cases availing the non-linear complex relationship.

## Data and Methodology

Counts of Confirmed and Recovered cases for all the available districts in India have been acquired from <https://www.covid19india.org/>. The 2nd wave of COVID-19 in India has prominently surged April, 2021 onwards, hence we have obtained our study for the period throughout the 1st wave of COVID-19 only. During March, 2020 these counts were too craggy, therefore we acquired data only for the period of April, 2020 to March, 2021. Spatial data for total six different meteorological parameters - 2-m Air Temperature (AT), Bias-corrected Total Precipitation (PRC), Specific Humidity (Hm), Cloud Cover (CLD), Incoming Short-wave Radiation (ISWR), Wind Speed (WS), and six different air quality parameters - Aerosol Optical Depth (AOD), Tropospheric Column Nitrogen di-Oxide (NO<sub>2</sub>), Total Column Ozone (O<sub>3</sub>), Surface concentration of Carbon Monoxide (CO), Sulphur di-Oxide (SO<sub>2</sub>) and Black Carbon (BC) have been incorporated in the present study. Remote Sensing based datasets are highly useful for various environmental studies (Bhatt et al., 2021; Das et al., 2017; Das and Gupta, 2021; Gupta et al., 2020b; Gupta et al., 2019; Moniruzzam et al., 2018; Nanda et al., 2018; Rousta et al., 2020), hence we have used such dataset from different sources. Monthly mean of these twelve environmental variables were further processed in ArcGIS software, adjoined and related with the monthly cumulative counts of confirmed and recovery cases for each months for each of those selected districts.

## Infections and recoveries during 1st COVID-19 waves in India

The district wise spatial distribution of COVID-19 confirmed cases and recoveries during the 1st COVID-19 wave (up to March, 2021) are shown in Figure 1. It shows that 35.03% districts had noted cases within the range of 10,000 to 1,00,000; while only 3.05% districts in India registered more than 1 lakh cases during this study period. Noteworthy, most of the districts have registered counts of infective cases within the range of 2500-5000 following the range of 10000-25000. Comprehensively, 21 states registered more than 1 lakh infected cases; among them only Maharashtra and Kerala had registered more than 10 lakh cases. The spatial distribution of cases also depict that the coastal districts were more anguished by misfortune than the districts located in the interior part of the country whereas the districts from the Himalayan Mountains and its foothills had lesser strife during this pandemic. The temporal pattern of daily cases of infections, recoveries, deceased, and test positivity (%) from all over the country were shown in Figure 2a. It depicts that the peak of pandemic was during the early September, 2020 when the daily death counts and confirmed cases were

129 highest, however daily test positivity was highest during July. These trends were at their  
 130 trough during the winter followed by the post-monsoon seasons but again started to incline  
 131 since March, 2021.

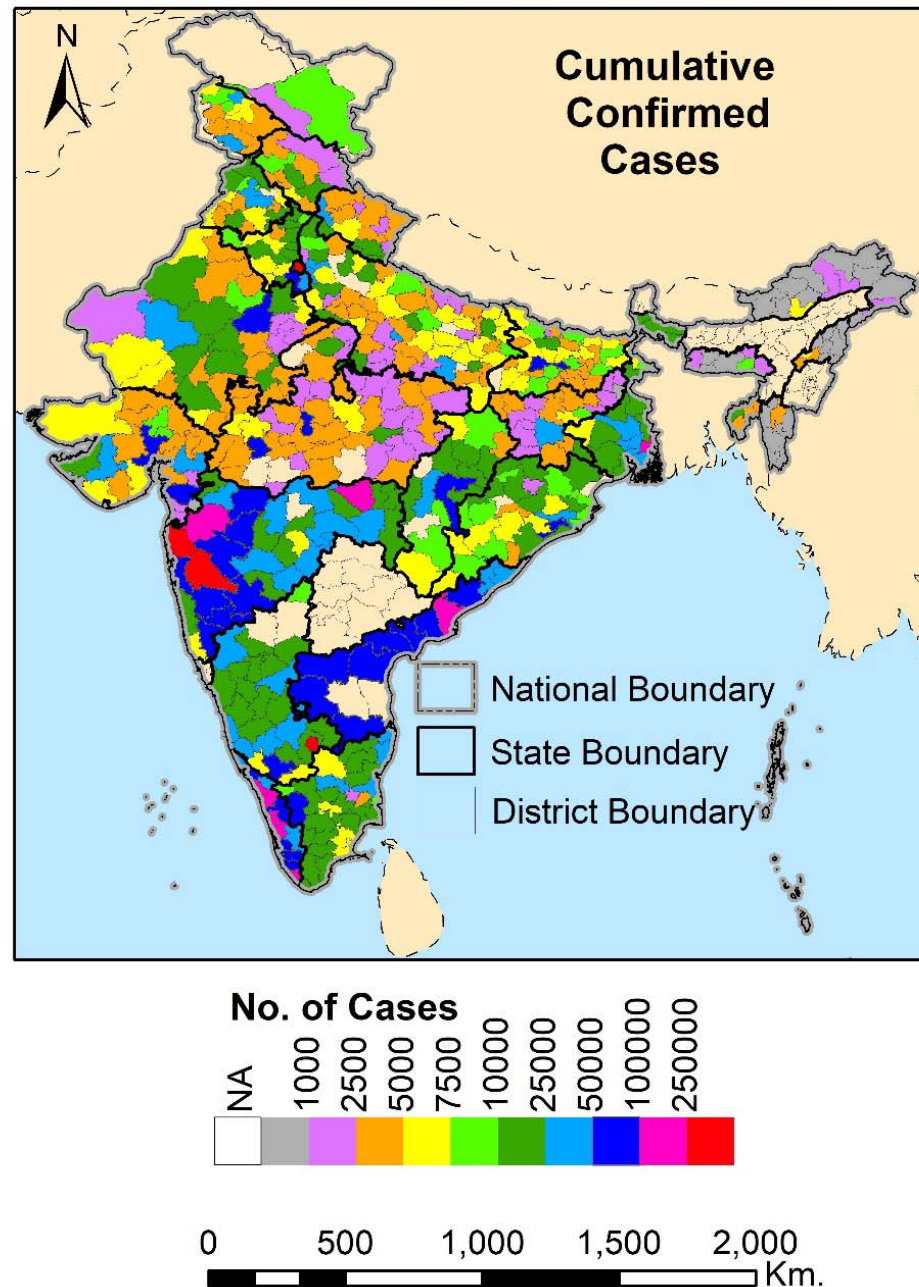

132

133

Figure 1 Distribution of confirmed cases



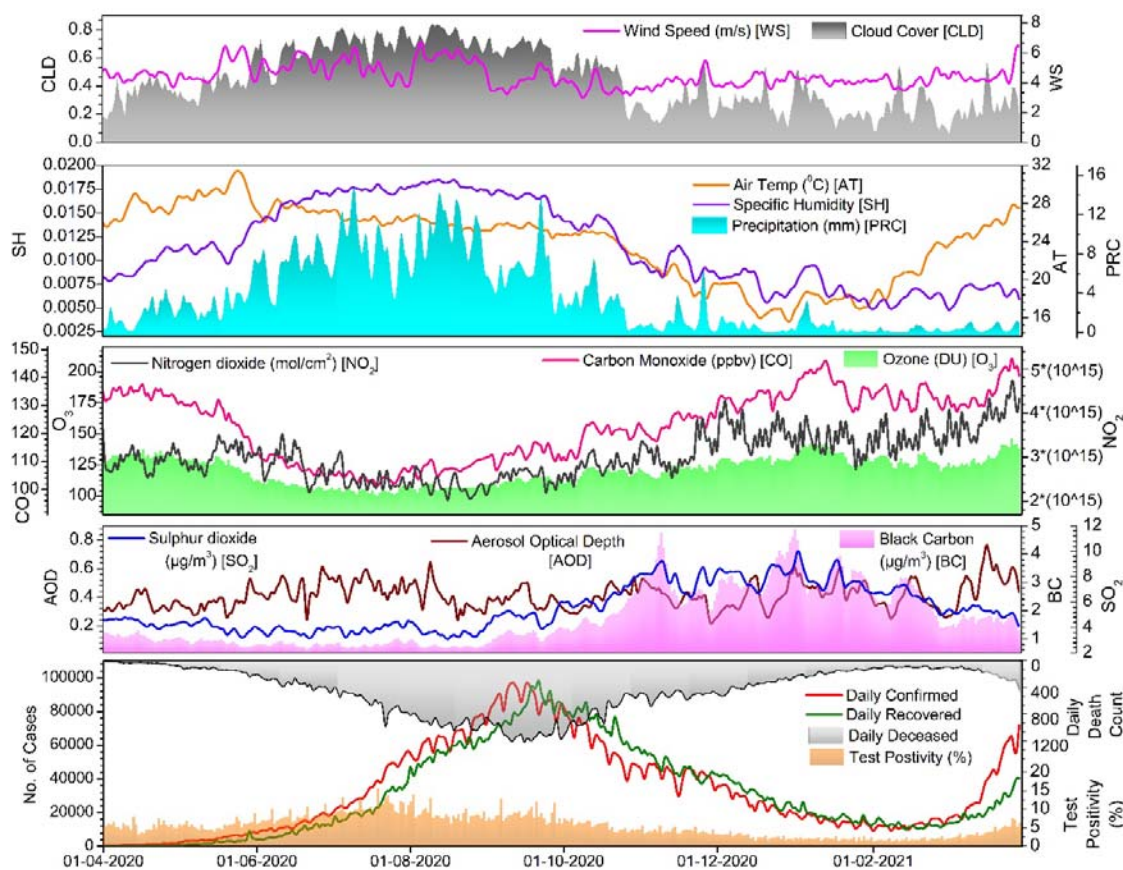

Figure 2 temporal trends

## Pearson's correlation test

Pearson's correlation technique was applied to explore the degree of association of environmental parameters with infected and recovered cases at 95% confidence interval using equation 1. A correlogram is also being prepared to better represent the interrelation of the variables of the input dataset.

$$r = \frac{\sum_{i=1}^n (En_i - \bar{En})(C_i - \bar{C})}{\sqrt{\sum_{i=1}^n (En_i - \bar{En})^2 \sum_{i=1}^n (C_i - \bar{C})^2}} \quad \dots \text{Equation 1}$$

Here,  $r$  is the correlation coefficient,  $En$  represents the environmental variables,  $C$  denotes the count of confirm and recovery cases individually.

## Results and Discussion

Pearson's correlation test (Figure 3) found that confirmed cases have significantly ( $p < 0.05$ ) positive correlation with the AT (0.483), ISWR (0.268) and WS (0.391), negative association with Hm (-0.304) and PRC (-0.288); however positive but non-significant ( $p > 0.05$ ) relation with CLD (0.109). It depicts that areas with areas with comparatively higher AT with greater ISWR and drier atmospheric conditions (lower humidity and lesser precipitation) seem to register more infected cases in India, quite similar to what was observed by Aslam et al.,

2020 and Islam et al., 2020 over Pakistan and Bangladesh respectively. Since the Indian landmass is located in the tropical latitudes of the Northern Hemisphere where the regional ISWR is higher than the global average ISWR during April to September (Hatzianastassiou et al., 2005), thus avails to put up the air temperature during these summer months. Thus, it may indirectly help viruses to spread out at higher temperature conditions. On the other hand, Dowell, 2001; Lowen et al., 2007 had shown that the transmission of respiratory virus via aerosol could be suppressed by higher humid conditions, but enhanced under dry conditions. Barreca, 2012; Dalziel et al., 2018 also suggested that low-humidity levels could be considered as an imperative risk factor for respiratory infection diseases (Tellier, 2006). Thus, the summer conditions become more susceptible for this viral transmission in India. A few studies such as Coccia, 2021; Rendana, 2020; Rosario et al., 2020 have opined that higher wind could lower the emanation of the virus, however we found persuasive correlation between wind and COVID-19 cases in India, thus agreeing to Babu et al., 2020; Gautam et al., 2021. Another crucial reason behind this might be that the districts located near and along the western coast in Kerala, Maharashtra as well as the districts of Tamilnadu, Andhra Pradesh and Odisha located in the eastern coast of India catalogued maximum cases during May to July, 2020 which is the onset duration of monsoon over Indian subcontinent, thus experience higher wind from the sea-side towards the land. Liu et al., 2020c had suggested that the rapid weather variability might result in an increase in respiratory infections in warming climatic conditions; moreover, study by Moriyama and Ichinohe, 2019 had found that higher ambient temperature could restrain the adaptive immune response to a virus infection which also could be accorded through the present study.

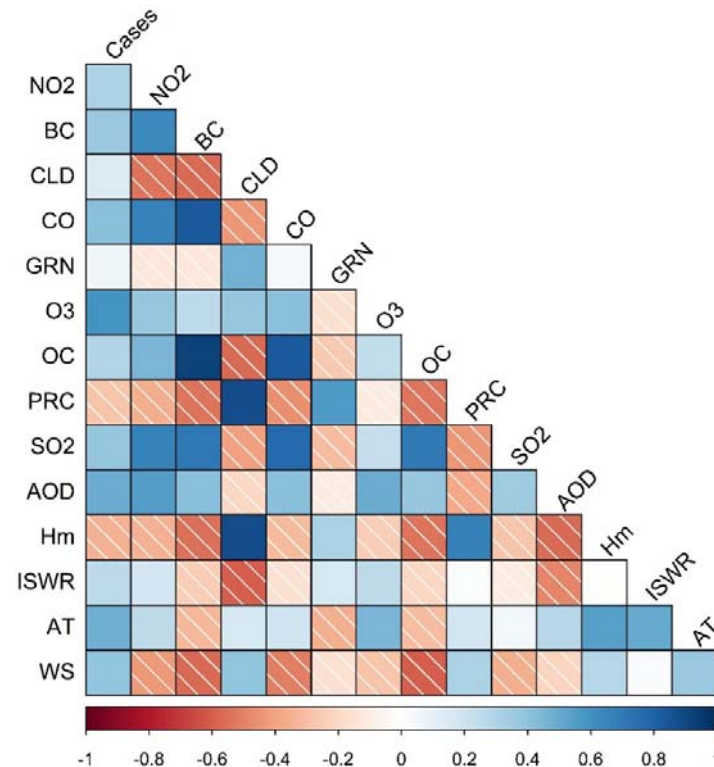

Figure 3 correlogram

In agreement of numerous scientific research conducted in the last two decades, the link between environmental pollution and chronic illnesses mainly the cardiovascular and respiratory diseases are quite comprehensible (Andersson et al., 2020; Chauhan and Johnston, 2003; Ghude et al., 2016; Mehta et al., 2013; Orru et al., 2017; Zhang et al., 2019b; Cieniewicz and Jaspers, 2007). In the current study we found all the seven air quality parameters to be significantly and positively correlated with confirmed cases. Figure 4 depicts that monthly confirmed cases was better correlated with monthly average concentration of O<sub>3</sub> (0.595) followed by AOD (0.497), CO (0.414), NO<sub>2</sub> (0.383), BC (0.374) and SO<sub>2</sub> (0.325). It confers that concentration of oxidant pollutants had a significant impact on COVID-19 transmission in Indian scenario. Earlier studies had conjectured the O<sub>3</sub> as a mighty oxidant (Nuvolone et al., 2018; Turner et al., 2015; Zhang et al., 2019c). Likewise, exposure to NO<sub>2</sub> has been found to be associated with the increasing risk of acute respiratory tract infections (Munawer, 2018; Suryadhi et al., 2020; Valko et al., 2007). On the other hand, CO is thoroughly soluble in the bloodstream (Power, 1968). It becomes toxic when blood reacts with haemoglobin (Badman and Jaffé, 1996; Schraufnagel et al., 2019). There were several hotspots observed in the northern IGP and eastern India contributing detestable amounts of CO and NO<sub>2</sub> that could be held accountable for the appalling air quality in those regions as it might have significantly swayed the exposed individuals to get intensely infected by the coronavirus. Therefore, higher concentration of O<sub>3</sub> along with its precursors (CO and NO<sub>2</sub>) could be held noxious for such awful viral emanation especially over northern and eastern part of India. Thus we agreed with Bashir et al., 2020; Li et al., 2020; Pansini and



196 Fornacca, 2020; Zhu et al., 2020b; Zoran et al., 2020 about the significance of O<sub>3</sub>, with CO  
197 and NO<sub>2</sub> pollution regarding the COVID-19 emanation. Furthermore, in developing countries  
198 like India, the organic fuel based power generation and daily household combustion activities  
199 are commonly observed which often results in excessive emission of SO<sub>2</sub> and carbonaceous  
200 pollutants such as CO and BC. A beguiling study by Hahon et al., 1985 with a rigorous  
201 snooping on mice had found that the severity of influenza virus infection was better  
202 recognizable with a prominent exposure to diesel engine emissions and coal dusts. In the  
203 present study, we have found a rich correlation between pollutants emitted due to fossil fuel  
204 combustion and COVID-19 outbreak patterns. Till date, a minimal study has obtained SO<sub>2</sub>  
205 and BC to investigate the surging of COVID-19. The pathophysiological corroboration  
206 cogently conveyed pathways of various diseases arose from SO<sub>2</sub> and NO<sub>2</sub> pollution  
207 (Brunekreef and Holgate, 2002; Chen et al., 2015; Kampa and Castanas, 2008). The elevated  
208 concentration of SO<sub>2</sub> can shorten the lung function, causing suffocation, wheezing, coughing,  
209 and also arouse the exasperation in the tissues inside the nose and the throat (Feuyit et al.,  
210 2019) (Chen et al., 2007; Kelsall et al., 1997). It was quite distinctive that higher SO<sub>2</sub> and  
211 coronavirus outbreak were experienced over IGP, Odisha, coastal areas of Gujarat and  
212 Maharashtra. The spatial distribution of BC also depicts an approximate pattern of higher  
213 concentration over IGP and eastern coast of Odisha. In various parts of the world, these  
214 pollutants have been adjudged as an indicator of adverse health effects (Janssen et al., 2011;  
215 Segersson et al., 2017; Tobias et al., 2014). It becomes virulent (Bourdrel et al., 2017; Kampa  
216 and Castanas, 2008), thus damaging the lung functions (Jacobson et al., 2014; Paulin and  
217 Hansel, 2016; Paunescu et al., 2019; Valavanidis et al., 2008; Xu et al., 2018a). Therefore, it  
218 can be quite distinctive that the ensued elevated pollution due to outrageous fossil fuel  
219 consumption could cause the neighbourhood to be less immune and predisposed to severe  
220 respiratory infection like COVID-19 (Kyung and Jeong, 2020; Suhaimi and Jalaludin, 2015;  
221 Thurston et al., 2017), hence prominently associated with pulmonary diseases (Anenberg  
222 Susan C. et al., 2010; Peters et al., 2001; Rosenthal et al., 2013). Since PM concentration  
223 can't be directly assessed through Satellite based observations (Gupta et al., 2021, 2006;  
224 Gupta and Christopher, 2009; Li et al., 2015), we correlated satellite derived AOD with  
225 infective cases over several districts during the study period, and found that the IGP was  
226 limned with exorbitant AOD where the coronavirus outbreak was also quite austere. Earlier,  
227 Spekrijse et al., 2013; Zhao et al., 2019 recommended the strong possibilities of airborne  
228 transmission of respiratory virus via fine dust particles. Recently, Comunian et al., 2020;  
229 Tang et al., 2020 also discussed the evidence of SARS-CoV-2 virus transmission via dust  
230 particles. Therefore, considering the elevated AOD over semi-arid north-west India along  
231 with scorching summer conditions, and the infective cases from Rajasthan, Punjab, Haryana  
232 and Uttar Pradesh during April-June. Interaction between the meteorological parameters and  
233 air pollutants' concentrations are quite complex and varying seasonally, and often influenced  
234 by the local physiography including the topographic variations such as location of mountains,  
235 valleys, or the presence of substantial water bodies such as large rivers, and lakes (Benjamin,  
236 1975; Eum et al., 2015; Hewson and Olsson, 1967; Mahapatra et al., 2019; Prabhu et al.,  
237 2020; Saikawa et al., 2019; Zhang et al., 2018). During summer, the rising AT and  
238 comparatively lesser SH ominously abet the pollutants' concentration by physio-chemical  
239 transformation (Analitis et al., 2018; Jayamurugan et al., 2013; Sario et al., 2013), henceforth

make warmer days commendatory for such virus infections. While comparing with the long term average conditions, many studies had acknowledged the imposition of four tier countrywide lockdown for relatively cleaner air in India during April to mid of June, 2020 (Gupta et al., 2020d; Naqvi et al., 2021; Nigam et al., 2021; Singh and Chauhan, 2020; Venter et al., 2020). Even though we found that the IGP followed by the coastal districts of West Bengal, Odisha, Andhra Pradesh, Maharashtra, Kerala, Tamilnadu had inhaled quite bad air where each states had registered more than 30,000 cases during that period. Intriguingly, the temporal trends of pollutants showed comparatively higher concentration during winter and post-monsoon seasons, while the infections were relatively lesser in both those seasons. Therefore, it suggests that the shoddy air quality could not be discretely blameworthy for coronavirus dissemination in India, rather bad air with successively increasing AT in summer environment could be held responsible.

## Conclusion

Our conscientious study suggests that the summer tropical environment in India may spare a more affirmative condition for SARS-CoV-2 transmission, agreeing with Sajadi et al., 2020; Xie and Zhu, 2020. Instead of squashing the COVID-19 curve, higher air temperature may significantly assist an augment in pandemic predicament in India. Comparatively higher wind in drier areas could indulge the virus to unfurl more, as also observed by Aidoo et al., 2021; Babu et al., 2020. Besides, the negative correlation between precipitation and infections, also discerned by Mansouri Daneshvar et al., 2021, illustrates the relevance of prevailing atmospheric conditions in dissemination of this pandemic. Scientific communities' acquiescence on the adverse impact of air quality on crude mortality is inevitable in any well-being circumstances across the world (Bentayeb et al., 2015; Davidson et al., 2005). Foreseeably, the poor air quality was perceived to be significantly correlated with the COVID-19 dissemination during the study period. The positive correlation between coal blazed pollution and COVID-19 outbreak, as well as the negative association between the recovery count from this disease and prevailing regional pollution levels stoutly suggest that the exorbitant air pollution due to bounteous non-renewable energy generation and its perpetual consumption might perturb the inbred immunity of residents in circumjacent area, and hinder them also in agile recovery from this disease. The concurrent heath tribulation and the interconnection of diseases affecting multiple organs are also decisively discerned during COVID-19 infections. During or in a later stage of treatment, several patients are also condemned to various post-syndrome infections mostly related to cardiovascular and respiratory disorders which might be the ramifications of virulent vulnerability to the gaseous pollution. Hence it altogether asserts that the environment needs to be ameliorated immensely by its standards to alleviate such deadly pandemic. The injurious impact of traffic pollution has also been discussed through various global and regional studies (Gauderman et al., 2007; Laumbach and Kipen, 2012; Urman et al., 2014). The pre-eminence of weather parameters on air quality is indubitable and evinced globally (Bhaskar and Mehta, 2010; Fisher, 2002; Yansui Liu et al., 2020e; Panofsky and Prasad, 1967; Qin et al., 2020; Seo et al., 2018; Zhang et al., 2015), hence its significant association with COVID-19 dissemination during a year-long period over India has been certainly revealed through the present study.

282

283 References –

- 284 Agius, A.M., Smallman, L.A., Pahor, A.L., 1998. Age, smoking and nasal ciliary beat  
285 frequency. *Clin Otolaryngol Allied Sci* 23, 227–230. <https://doi.org/10.1046/j.1365-2273.1998.00141.x>  
286
- 287 Ahmadi, M., Sharifi, A., Dorosti, S., Jafarzadeh Ghouschi, S., Ghanbari, N., 2020.  
288 Investigation of effective climatology parameters on COVID-19 outbreak in Iran.  
289 *Science of The Total Environment* 729, 138705.  
290 <https://doi.org/10.1016/j.scitotenv.2020.138705>
- 291 Aidoo, E.N., Adebajji, A.O., Awashie, G.E., Appiah, S.K., 2021. The effects of weather on  
292 the spread of COVID-19: evidence from Ghana. *Bull Natl Res Cent* 45, 20.  
293 <https://doi.org/10.1186/s42269-021-00484-3>
- 294 Akimoto, H., Mori, Y., Sasaki, K., Nakanishi, H., Ohizumi, T., Itano, Y., 2015. Analysis of  
295 monitoring data of ground-level ozone in Japan for long-term trend during 1990–  
296 2010: Causes of temporal and spatial variation. *Atmospheric Environment* 102, 302–  
297 310. <https://doi.org/10.1016/j.atmosenv.2014.12.001>
- 298 Al Ashry, H.S., Modrykamien, A.M., 2014. Humidification during Mechanical Ventilation in  
299 the Adult Patient. *BioMed Research International* 2014, e715434.  
300 <https://doi.org/10.1155/2014/715434>
- 301 Alag, S., 2020. Analysis of COVID-19 clinical trials: A data-driven, ontology-based, and  
302 natural language processing approach. *PLOS ONE* 15, e0239694.  
303 <https://doi.org/10.1371/journal.pone.0239694>
- 304 Ali, N., Islam, F., 2020. The Effects of Air Pollution on COVID-19 Infection and Mortality—  
305 A Review on Recent Evidence. *Front Public Health* 8.  
306 <https://doi.org/10.3389/fpubh.2020.580057>
- 307 Al-Rousan, N., Al-Najjar, H., 2020. The correlation between the spread of COVID-19  
308 infections and weather variables in 30 Chinese provinces and the impact of Chinese  
309 government mitigation plans. *Eur Rev Med Pharmacol Sci* 24, 4565–4571.  
310 [https://doi.org/10.26355/eurrev\\_202004\\_21042](https://doi.org/10.26355/eurrev_202004_21042)
- 311 Analitis, A., de' Donato, F., Scortichini, M., Lanki, T., Basagana, X., Ballester, F., Astrom,  
312 C., Paldy, A., Pascal, M., Gasparrini, A., Michelozzi, P., Katsouyanni, K., 2018.  
313 Synergistic Effects of Ambient Temperature and Air Pollution on Health in Europe:  
314 Results from the PHASE Project. *Int J Environ Res Public Health* 15.  
315 <https://doi.org/10.3390/ijerph15091856>
- 316 Andersson, E.M., Ögren, M., Molnár, P., Segersson, D., Rosengren, A., Stockfelt, L., 2020.  
317 Road traffic noise, air pollution and cardiovascular events in a Swedish cohort.  
318 *Environmental Research* 185, 109446. <https://doi.org/10.1016/j.envres.2020.109446>
- 319 Andronache, C., 2016. Dependence of Daily Aerosol Wet Deposition on Precipitation at  
320 Appalachian Mountains Site in the United States. *Aerosol Air Qual. Res.* 16, 665–  
321 673. <https://doi.org/10.4209/aaqr.2015.05.0322>
- 322 Anenberg Susan C., Horowitz Larry W., Tong Daniel Q., West J. Jason, 2010. An Estimate  
323 of the Global Burden of Anthropogenic Ozone and Fine Particulate Matter on  
324 Premature Human Mortality Using Atmospheric Modeling. *Environmental Health*  
325 *Perspectives* 118, 1189–1195. <https://doi.org/10.1289/ehp.0901220>
- 326 Aslam, B., Khalil, U., Azam, U., Maqsoom, A., 2020. A correlation study between weather  
327 and atmosphere with COVID-19 pandemic in Islamabad, Pakistan. *Spat. Inf. Res.*  
328 <https://doi.org/10.1007/s41324-020-00366-2>
- 329 Asraf, H.M., Nooritawati, M.T., Rizam, M.S.B.S., 2012. A Comparative Study in Kernel-  
330 Based Support Vector Machine of Oil Palm Leaves Nutrient Disease. *Procedia*

331 Engineering, International Symposium on Robotics and Intelligent Sensors 2012  
332 (IRIS 2012) 41, 1353–1359. <https://doi.org/10.1016/j.proeng.2012.07.321>  
333 Auler, A.C., Cássaro, F.A.M., da Silva, V.O., Pires, L.F., 2020. Evidence that high  
334 temperatures and intermediate relative humidity might favor the spread of COVID-19  
335 in tropical climate: A case study for the most affected Brazilian cities. *Science of The*  
336 *Total Environment* 729, 139090. <https://doi.org/10.1016/j.scitotenv.2020.139090>  
337 Awasthi, A., Sharma, A., Kaur, P., Gugamsetty, B., Kumar, A., 2020. Statistical  
338 interpretation of environmental influencing parameters on COVID-19 during the  
339 lockdown in Delhi, India. *Environ Dev Sustain.* [https://doi.org/10.1007/s10668-020-](https://doi.org/10.1007/s10668-020-01000-9)  
340 [01000-9](https://doi.org/10.1007/s10668-020-01000-9)  
341 Azuma, K., Yanagi, U., Kagi, N., Kim, H., Ogata, M., Hayashi, M., 2020. Environmental  
342 factors involved in SARS-CoV-2 transmission: effect and role of indoor  
343 environmental quality in the strategy for COVID-19 infection control. *Environmental*  
344 *Health and Preventive Medicine* 25, 66. <https://doi.org/10.1186/s12199-020-00904-2>  
345 Babu, S.R., Rao, N.N., Kumar, S.V., Paul, S., Pani, S.K., 2020. Plausible Role of  
346 Environmental Factors on COVID-19 Transmission in the Megacity Delhi, India.  
347 *Aerosol Air Qual. Res.* 20, 2075–2084. <https://doi.org/10.4209/aaqr.2020.06.0314>  
348 Badman, D.G., Jaffé, E.R., 1996. Blood and air pollution: State of knowledge and research  
349 needs. *Otolaryngology - Head and Neck Surgery* 114, 205–208.  
350 [https://doi.org/10.1016/S0194-5998\(96\)70166-3](https://doi.org/10.1016/S0194-5998(96)70166-3)  
351 Balakrishnan, K., Dey, S., Gupta, T., Dhaliwal, R.S., Brauer, M., Cohen, A.J., Stanaway,  
352 J.D., Beig, G., Joshi, T.K., Aggarwal, A.N., Sabde, Y., Sadhu, H., Frostad, J., Causey,  
353 K., Godwin, W., Shukla, D.K., Kumar, G.A., Varghese, C.M., Muraleedharan, P.,  
354 Agrawal, A., Anjana, R.M., Bhansali, A., Bhardwaj, D., Burkart, K., Cercy, K.,  
355 Chakma, J.K., Chowdhury, S., Christopher, D.J., Dutta, E., Furtado, M., Ghosh, S.,  
356 Ghoshal, A.G., Glenn, S.D., Guleria, R., Gupta, R., Jeemon, P., Kant, R., Kant, S.,  
357 Kaur, T., Koul, P.A., Krish, V., Krishna, B., Larson, S.L., Madhipatla, K., Mahesh,  
358 P.A., Mohan, V., Mukhopadhyay, S., Mutreja, P., Naik, N., Nair, S., Nguyen, G.,  
359 Odell, C.M., Pandian, J.D., Prabhakaran, D., Prabhakaran, P., Roy, A., Salvi, S.,  
360 Sambandam, S., Saraf, D., Sharma, M., Shrivastava, A., Singh, V., Tandon, N.,  
361 Thomas, N.J., Torre, A., Xavier, D., Yadav, G., Singh, S., Shekhar, C., Vos, T.,  
362 Dandona, R., Reddy, K.S., Lim, S.S., Murray, C.J.L., Venkatesh, S., Dandona, L.,  
363 2019. The impact of air pollution on deaths, disease burden, and life expectancy  
364 across the states of India: the Global Burden of Disease Study 2017. *The Lancet*  
365 *Planetary Health* 3, e26–e39. [https://doi.org/10.1016/S2542-5196\(18\)30261-4](https://doi.org/10.1016/S2542-5196(18)30261-4)  
366 Barreca, A.I., 2012. Climate change, humidity, and mortality in the United States. *Journal of*  
367 *Environmental Economics and Management* 63, 19–34.  
368 <https://doi.org/10.1016/j.jeem.2011.07.004>  
369 Bashir, M.F., Ma, B., Bilal, Komal, B., Bashir, M.A., Tan, D., Bashir, M., 2020a. Correlation  
370 between climate indicators and COVID-19 pandemic in New York, USA. *Science of*  
371 *The Total Environment* 728, 138835. <https://doi.org/10.1016/j.scitotenv.2020.138835>  
372 Bashir, M.F., Ma, B.J., Bilal, null, Komal, B., Bashir, M.A., Farooq, T.H., Iqbal, N., Bashir,  
373 M., 2020b. Correlation between environmental pollution indicators and COVID-19  
374 pandemic: A brief study in Californian context. *Environ Res* 187, 109652.  
375 <https://doi.org/10.1016/j.envres.2020.109652>  
376 Ben-Hur, A., Ong, C.S., Sonnenburg, S., Schölkopf, B., Rätsch, G., 2008. Support Vector  
377 Machines and Kernels for Computational Biology. *PLOS Computational Biology* 4.  
378 <https://doi.org/10.1371/journal.pcbi.1000173>  
379 Benjamin, S.F., 1975. Study of Topographical Effects on Dispersion of Pollution, in:  
380 Frenkiel, F.N., Munn, R.E. (Eds.), *Advances in Geophysics*, International Union of



381 Theoretical and Applied Mechanics and International Union of Geodesy and  
382 Geophysics. Elsevier, p. 380. [https://doi.org/10.1016/S0065-2687\(08\)60602-0](https://doi.org/10.1016/S0065-2687(08)60602-0)

383 Bentayeb, M., Wagner, V., Stempfelet, M., Zins, M., Goldberg, M., Pascal, M., Larrieu, S.,  
384 Beaudeau, P., Cassadou, S., Eilstein, D., Filleul, L., Le Tertre, A., Medina, S., Pascal,  
385 L., Prouvost, H., Quénel, P., Zeghnoun, A., Lefranc, A., 2015. Association between  
386 long-term exposure to air pollution and mortality in France: A 25-year follow-up  
387 study. *Environment International* 85, 5–14.  
388 <https://doi.org/10.1016/j.envint.2015.08.006>

389 Bertuzzo, E., Mari, L., Pasetto, D., Miccoli, S., Casagrandi, R., Gatto, M., Rinaldo, A., 2020.  
390 The geography of COVID-19 spread in Italy and implications for the relaxation of  
391 confinement measures. *Nat Commun* 11, 4264. [https://doi.org/10.1038/s41467-020-](https://doi.org/10.1038/s41467-020-18050-2)  
392 [18050-2](https://doi.org/10.1038/s41467-020-18050-2)

393 Bhaskar, B.V., Mehta, V.M., 2010. Atmospheric Particulate Pollutants and their Relationship  
394 with Meteorology in Ahmedabad. *Aerosol Air Qual. Res.* 10, 301–315.  
395 <https://doi.org/10.4209/aaqr.2009.10.0069>

396 Bhatt, C.M., Gupta, A., Roy, A., Dalal, P., Chauhan, P., 2021. Geospatial analysis of  
397 September, 2019 floods in the lower gangetic plains of Bihar using multi-temporal  
398 satellites and river gauge data. *Geomatics, Natural Hazards and Risk* 12, 84–102.  
399 <https://doi.org/10.1080/19475705.2020.1861113>

400 Bherwani, H., Gupta, A., Anjum, S., Anshul, A., Kumar, R., 2020. Exploring dependence of  
401 COVID-19 on environmental factors and spread prediction in India. *npj Climate and*  
402 *Atmospheric Science* 3, 1–13. <https://doi.org/10.1038/s41612-020-00142-x>

403 Bochenek, B., Jankowski, M., Gruszczynska, M., Nykiel, G., Gruszczynski, M., Jaczewski,  
404 A., Ziemianski, M., Pyrc, R., Figurski, M., Pinkas, J., 2021. Impact of Meteorological  
405 Conditions on the Dynamics of the COVID-19 Pandemic in Poland. *Int J Environ Res*  
406 *Public Health* 18. <https://doi.org/10.3390/ijerph18083951>

407 Borah, M.J., Hazarika, B., Panda, S.K., Nieto, J.J., 2020. Examining the correlation between  
408 the weather conditions and COVID-19 pandemic in India: A mathematical evidence.  
409 *Results in Physics* 19, 103587. <https://doi.org/10.1016/j.rinp.2020.103587>

410 Bourdrel, T., Annesi-Maesano, I., Alahmad, B., Maesano, C.N., Bind, M.-A., 2021. The  
411 impact of outdoor air pollution on COVID-19: a review of evidence from in vitro,  
412 animal, and human studies. *European Respiratory Review* 30.  
413 <https://doi.org/10.1183/16000617.0242-2020>

414 Bourdrel, T., Bind, M.-A., Béjot, Y., Morel, O., Argacha, J.-F., 2017. Cardiovascular effects  
415 of air pollution. *Arch Cardiovasc Dis* 110, 634–642.  
416 <https://doi.org/10.1016/j.acvd.2017.05.003>

417 Briz-Redón, Á., Serrano-Aroca, Á., 2020. A spatio-temporal analysis for exploring the effect  
418 of temperature on COVID-19 early evolution in Spain. *Science of The Total*  
419 *Environment* 728, 138811. <https://doi.org/10.1016/j.scitotenv.2020.138811>

420 Brunekreef, B., Holgate, S.T., 2002. Air pollution and health. *The Lancet* 360, 1233–1242.  
421 [https://doi.org/10.1016/S0140-6736\(02\)11274-8](https://doi.org/10.1016/S0140-6736(02)11274-8)

422 Byass, P., 2020. Eco-epidemiological assessment of the COVID-19 epidemic in China,  
423 January–February 2020. *Global Health Action* 13, 1760490.  
424 <https://doi.org/10.1080/16549716.2020.1760490>

425 Chauhan, A.J., Johnston, S.L., 2003. Air pollution and infection in respiratory illness. *British*  
426 *Medical Bulletin* 68, 95–112. <https://doi.org/10.1093/bmb/ldg022>

427 Chen, J.-C., Wang, X., Wellenius, G.A., Serre, M.L., Driscoll, I., Casanova, R., McArdle,  
428 J.J., Manson, J.E., Chui, H.C., Espeland, M.A., 2015. Ambient air pollution and  
429 neurotoxicity on brain structure: Evidence from women’s health initiative memory  
430 study. *Annals of Neurology* 78, 466–476. <https://doi.org/10.1002/ana.24460>



431 Chen, S., Prettnner, K., Kuhn, M., Geldsetzer, P., Wang, C., Bärnighausen, T., Bloom, D.E.,  
432 2021. Climate and the spread of COVID-19. *Sci Rep* 11, 9042.  
433 <https://doi.org/10.1038/s41598-021-87692-z>

434 Chen, T.-M., Gokhale, J., Shofer, S., Kuschner, W.G., 2007. Outdoor air pollution: nitrogen  
435 dioxide, sulfur dioxide, and carbon monoxide health effects. *Am J Med Sci* 333, 249–  
436 256. <https://doi.org/10.1097/MAJ.0b013e31803b900f>

437 Chudnovsky, A.A., Koutrakis, P., Kloog, I., Melly, S., Nordio, F., Lyapustin, A., Wang, Y.,  
438 Schwartz, J., 2014. Fine particulate matter predictions using high resolution Aerosol  
439 Optical Depth (AOD) retrievals. *Atmospheric Environment* 89, 189–198.  
440 <https://doi.org/10.1016/j.atmosenv.2014.02.019>

441 Ciencewicz, J., Jaspers, I., 2007. Air Pollution and Respiratory Viral Infection. *Inhalation*  
442 *Toxicology* 19, 1135–1146. <https://doi.org/10.1080/08958370701665434>

443 Coccia, M., 2021. How do low wind speeds and high levels of air pollution support the  
444 spread of COVID-19? *Atmospheric Pollution Research* 12, 437–445.  
445 <https://doi.org/10.1016/j.apr.2020.10.002>

446 Coker, E.S., Cavalli, L., Fabrizi, E., Guastella, G., Lippo, E., Parisi, M.L., Pontarollo, N.,  
447 Rizzati, M., Varacca, A., Vergalli, S., 2020. The Effects of Air Pollution on COVID-  
448 19 Related Mortality in Northern Italy. *Environ Resource Econ* 76, 611–634.  
449 <https://doi.org/10.1007/s10640-020-00486-1>

450 Comunian, S., Dongo, D., Milani, C., Palestini, P., 2020. Air Pollution and COVID-19: The  
451 Role of Particulate Matter in the Spread and Increase of COVID-19's Morbidity and  
452 Mortality. *Int J Environ Res Public Health* 17. <https://doi.org/10.3390/ijerph17124487>

453 Cragg, L., Williams, S., Chavannes, N.H., 2016. FRESH AIR: an implementation research  
454 project funded through Horizon 2020 exploring the prevention, diagnosis and  
455 treatment of chronic respiratory diseases in low-resource settings. *npj Primary Care*  
456 *Respiratory Medicine* 26, 1–5. <https://doi.org/10.1038/npjpcrm.2016.35>

457 Dalziel, B.D., Kissler, S., Gog, J.R., Viboud, C., Bjørnstad, O.N., Metcalf, C.J.E., Grenfell,  
458 B.T., 2018. Urbanization and humidity shape the intensity of influenza epidemics in  
459 U.S. cities. *Science* 362, 75–79. <https://doi.org/10.1126/science.aat6030>

460 D'Amato, M., Molino, A., Calabrese, G., Cecchi, L., Annesi-Maesano, I., D'Amato, G.,  
461 2018. The impact of cold on the respiratory tract and its consequences to respiratory  
462 health. *Clinical and Translational Allergy* 8, 20. <https://doi.org/10.1186/s13601-018-0208-9>

463 Das, S., Gupta, A., 2021. Multi-criteria decision based geospatial mapping of flood  
464 susceptibility and temporal hydro-geomorphic changes in the Subarnarekha basin,  
465 India. *Geoscience Frontiers* 12, 101206. <https://doi.org/10.1016/j.gsf.2021.101206>

466 Das, S., Gupta, A., Ghosh, S., 2017. Exploring groundwater potential zones using MIF  
467 technique in semi-arid region: a case study of Hingoli district, Maharashtra. *Spat. Inf.*  
468 *Res.* 25, 749–756. <https://doi.org/10.1007/s41324-017-0144-0>

469 Davidson, C.I., Phalen, R.F., Solomon, P.A., 2005. Airborne Particulate Matter and Human  
470 Health: A Review. *Aerosol Science and Technology* 39, 737–749.  
471 <https://doi.org/10.1080/02786820500191348>

472 Deng, X., Rui, W., Zhang, F., Ding, W., 2013. PM<sub>2.5</sub> induces Nrf2-mediated defense  
473 mechanisms against oxidative stress by activating PIK3/AKT signaling pathway in  
474 human lung alveolar epithelial A549 cells. *Cell Biol Toxicol* 29, 143–157.  
475 <https://doi.org/10.1007/s10565-013-9242-5>

476 Desideri, D., Roselli, C., Meli, M.A., Feduzi, L., 2007. Comparison between the diurnal  
477 trends of ozone and radon gas concentrations measured at ground in the semi-rural  
478 site of Central Italy. *J Radioanal Nucl Chem* 273, 345–351.  
479 <https://doi.org/10.1007/s10967-007-6871-2>

480

481 Dowell, S.F., 2001. Seasonal variation in host susceptibility and cycles of certain infectious  
482 diseases. *Emerg Infect Dis* 7, 369–374. <https://doi.org/10.3201/eid0703.010301>

483 Emediegwu, L.E., 2021. Health impacts of daily weather fluctuations: Empirical evidence  
484 from COVID-19 in U.S. counties. *Journal of Environmental Management* 291,  
485 112662. <https://doi.org/10.1016/j.jenvman.2021.112662>

486 Engel-Cox, J.A., Hoff, R.M., Haymet, A.D.J., 2004. Recommendations on the Use of  
487 Satellite Remote-Sensing Data for Urban Air Quality. *Journal of the Air & Waste*  
488 *Management Association* 54, 1360–1371.  
489 <https://doi.org/10.1080/10473289.2004.10471005>

490 Eslami, H., Jalili, M., 2020. The role of environmental factors to transmission of SARS-CoV-  
491 2 (COVID-19). *AMB Express* 10. <https://doi.org/10.1186/s13568-020-01028-0>

492 Eum, Y., Song, I., Kim, H.-C., Leem, J.-H., Kim, S.-Y., 2015. Computation of geographic  
493 variables for air pollution prediction models in South Korea. *Environ Health Toxicol*  
494 30. <https://doi.org/10.5620/eh.t.2015010>

495 Fadli, A., Nugraha, A.W.W., Aliim, M.S., Taryana, A., Kurniawan, Y.I., Purnomo, W.H.,  
496 2020. Simple Correlation Between Weather and COVID-19 Pandemic Using Data  
497 Mining Algorithms. *IOP Conf. Ser.: Mater. Sci. Eng.* 982, 012015.  
498 <https://doi.org/10.1088/1757-899X/982/1/012015>

499 Fares, A., 2013. Factors Influencing the Seasonal Patterns of Infectious Diseases. *Int J Prev*  
500 *Med* 4, 128–132.

501 Fawad, M., Mubarik, S., Malik, S.S., Ren, J., 2021. Statistical analysis of COVID-19  
502 infection caused by environmental factors: Evidence from Pakistan. *Life Sci* 269,  
503 119093. <https://doi.org/10.1016/j.lfs.2021.119093>

504 Feuyit, G., Nzali, S., Lambi, J.N., Laminsi, S., 2019. Air Quality and Human Health Risk  
505 Assessment in the Residential Areas at the Proximity of the Nkolfoulou Landfill in  
506 Yaoundé Metropolis, Cameroon. *Journal of Chemistry* 2019, e3021894.  
507 <https://doi.org/10.1155/2019/3021894>

508 Ficetola, G.F., Rubolini, D., 2021. Containment measures limit environmental effects on  
509 COVID-19 early outbreak dynamics. *Science of The Total Environment* 761, 144432.  
510 <https://doi.org/10.1016/j.scitotenv.2020.144432>

511 Fisher, B., 2002. Meteorological factors influencing the occurrence of air pollution episodes  
512 involving chimney plumes. *Meteorological Applications* 9, 199–210.  
513 <https://doi.org/10.1017/S1350482702002050>

514 Gallerani, M., Reverberi, R., Salmi, R., Smolensky, M.H., Manfredini, R., 2013. Seasonal  
515 variation of platelets in a cohort of Italian blood donors: a preliminary report.  
516 *European Journal of Medical Research* 18, 31. <https://doi.org/10.1186/2047-783X-18-31>

517

518 Gauderman, W.J., Vora, H., McConnell, R., Berhane, K., Gilliland, F., Thomas, D.,  
519 Lurmann, F., Avol, E., Kunzli, N., Jerrett, M., Peters, J., 2007. Effect of exposure to  
520 traffic on lung development from 10 to 18 years of age: a cohort study. *The Lancet*  
521 369, 571–577. [https://doi.org/10.1016/S0140-6736\(07\)60037-3](https://doi.org/10.1016/S0140-6736(07)60037-3)

522 Gautam, S., Samuel, C., Gautam, A.S., Kumar, S., 2021. Strong link between coronavirus  
523 count and bad air: a case study of India. *Environ Dev Sustain.*  
524 <https://doi.org/10.1007/s10668-021-01366-4>

525 Ge, X.-Y., Li, J.-L., Yang, X.-L., Chmura, A.A., Zhu, G., Epstein, J.H., Mazet, J.K., Hu, B.,  
526 Zhang, W., Peng, C., Zhang, Y.-J., Luo, C.-M., Tan, B., Wang, N., Zhu, Y., Cramer, G.,  
527 Zhang, S.-Y., Wang, L.-F., Daszak, P., Shi, Z.-L., 2013. Isolation and  
528 characterization of a bat SARS-like coronavirus that uses the ACE2 receptor. *Nature*  
529 503, 535–538. <https://doi.org/10.1038/nature12711>

530 Gettelman, A., Sherwood, S.C., 2016. Processes Responsible for Cloud Feedback. *Curr Clim*  
531 *Change Rep* 2, 179–189. <https://doi.org/10.1007/s40641-016-0052-8>  
532 Ghude, S.D., Chate, D.M., Jena, C., Beig, G., Kumar, R., Barth, M.C., Pfister, G.G.,  
533 Fadnavis, S., Pithani, P., 2016. Premature mortality in India due to PM<sub>2.5</sub> and ozone  
534 exposure: Premature Mortality in India. *Geophys. Res. Lett.* 43, 4650–4658.  
535 <https://doi.org/10.1002/2016GL068949>  
536 Gorbalenya, A.E., Baker, S.C., Baric, R.S., Groot, R.J. de, Drosten, C., Gulyaeva, A.A.,  
537 Haagmans, B.L., Lauber, C., Leontovich, A.M., Neuman, B.W., Penzar, D., Perlman,  
538 S., Poon, L.L.M., Samborskiy, D., Sidorov, I.A., Sola, I., Ziebuhr, J., 2020. Severe  
539 acute respiratory syndrome-related coronavirus: The species and its viruses – a  
540 statement of the Coronavirus Study Group. *bioRxiv* 2020.02.07.937862.  
541 <https://doi.org/10.1101/2020.02.07.937862>  
542 Guan, W., Ni, Z., Hu, Yu, Liang, W., Ou, C., He, J., Liu, L., Shan, H., Lei, C., Hui, D.S.C.,  
543 Du, B., Li, L., Zeng, G., Yuen, K.-Y., Chen, R., Tang, C., Wang, T., Chen, P., Xiang,  
544 J., Li, S., Wang, Jin-lin, Liang, Z., Peng, Y., Wei, L., Liu, Y., Hu, Ya-hua, Peng, P.,  
545 Wang, Jian-ming, Liu, J., Chen, Z., Li, G., Zheng, Z., Qiu, S., Luo, J., Ye, C., Zhu, S.,  
546 Zhong, N., 2020. Clinical Characteristics of Coronavirus Disease 2019 in China. *N*  
547 *Engl J Med* 382, 1708–1720. <https://doi.org/10.1056/NEJMoa2002032>  
548 Gujral, H., Sinha, A., 2021. Association between exposure to airborne pollutants and  
549 COVID-19 in Los Angeles, United States with ensemble-based dynamic emission  
550 model. *Environmental Research* 194, 110704.  
551 <https://doi.org/10.1016/j.envres.2020.110704>  
552 Gunthe, S.S., Swain, B., Patra, S.S., Amte, A., 2020. On the global trends and spread of the  
553 COVID-19 outbreak: preliminary assessment of the potential relation between  
554 location-specific temperature and UV index. *J Public Health (Berl.)*.  
555 <https://doi.org/10.1007/s10389-020-01279-y>  
556 Guo, C., Bo, Y., Lin, C., Li, H.B., Zeng, Y., Zhang, Y., Hossain, M.S., Chan, J.W.M., Yeung,  
557 D.W., Kwok, K.-O., Wong, S.Y.S., Lau, A.K.H., Lao, X.Q., 2021. Meteorological  
558 factors and COVID-19 incidence in 190 countries: An observational study. *Sci Total*  
559 *Environ* 757, 143783. <https://doi.org/10.1016/j.scitotenv.2020.143783>  
560 Guo, C., Zhang, Z., Lau, A.K.H., Lin, C.Q., Chuang, Y.C., Chan, J., Jiang, W.K., Tam, T.,  
561 Yeoh, E.-K., Chan, T.-C., Chang, L.-Y., Lao, X.Q., 2018. Effect of long-term  
562 exposure to fine particulate matter on lung function decline and risk of chronic  
563 obstructive pulmonary disease in Taiwan: a longitudinal, cohort study. *The Lancet*  
564 *Planetary Health* 2, e114–e125. [https://doi.org/10.1016/S2542-5196\(18\)30028-7](https://doi.org/10.1016/S2542-5196(18)30028-7)  
565 Gupta, A., Asopa, U., Bhattacharjee, R., 2019. Land Subsidence Monitoring in Jagadhri City  
566 Using Sentinel 1 Data and DInSAR Processing. *Proceedings* 24, 25.  
567 <https://doi.org/10.3390/IECG2019-06230>  
568 Gupta, A., Banerjee, S., Das, S., 2020a. Significance of geographical factors to the COVID-  
569 19 outbreak in India. *Model. Earth Syst. Environ.* 6, 2645–2653.  
570 <https://doi.org/10.1007/s40808-020-00838-2>  
571 Gupta, A., Bhatt, C.M., Roy, A., Chauhan, P., 2020d. COVID-19 lockdown a window of  
572 opportunity to understand the role of human activity on forest fire incidences in the  
573 Western Himalaya, India. *CURRENT SCIENCE* 119, 9.  
574 Gupta, A., Kant, Y., Mitra, D., Chauhan, P., 2021. Spatio-temporal distribution of INSAT-3D  
575 AOD derived particulate matter concentration over India. *Atmospheric Pollution*  
576 *Research* 12, 159–172. <https://doi.org/10.1016/j.apr.2020.08.031>  
577 Gupta, A., Moniruzzaman, M., Hande, A., Rousta, I., Olafsson, H., Mondal, K.K., 2020e.  
578 Estimation of particulate matter (PM<sub>2.5</sub>, PM<sub>10</sub>) concentration and its variation over

579 urban sites in Bangladesh. *SN Appl. Sci.* 2, 1993. [https://doi.org/10.1007/s42452-020-](https://doi.org/10.1007/s42452-020-03829-1)  
580 03829-1

581 Gupta, A., Pradhan, B., 2020a. Impact of Daily Weather on COVID-19 outbreak in India.  
582 <https://doi.org/10.1101/2020.06.15.20131490>

583 Gupta, A., Pradhan, B., 2020b. Assessment of temporal trend of COVID-19 outbreak in  
584 India. <https://doi.org/10.31219/osf.io/qyre6>

585 Gupta, A., Pradhan, B., Maulud, K.N.A., 2020c. Estimating the Impact of Daily Weather on  
586 the Temporal Pattern of COVID-19 Outbreak in India. *Earth Syst Environ* 4, 523–  
587 534. <https://doi.org/10.1007/s41748-020-00179-1>

588 Gupta, P., Christopher, S.A., 2009. Particulate matter air quality assessment using integrated  
589 surface, satellite, and meteorological products: 2. A neural network approach. *J.*  
590 *Geophys. Res.* 114, D20205. <https://doi.org/10.1029/2008JD011497>

591 Gupta, P., Christopher, S.A., Wang, J., Gehrig, R., Lee, Y., Kumar, N., 2006. Satellite remote  
592 sensing of particulate matter and air quality assessment over global cities.  
593 *Atmospheric Environment* 40, 5880–5892.  
594 <https://doi.org/10.1016/j.atmosenv.2006.03.016>

595 Gupta, S., Raghuwanshi, G.S., Chanda, A., 2020b. Effect of weather on COVID-19 spread in  
596 the US: A prediction model for India in 2020. *Science of The Total Environment* 728,  
597 138860. <https://doi.org/10.1016/j.scitotenv.2020.138860>

598 Hahon, N., Booth, J.A., Green, F., Lewis, T.R., 1985. Influenza virus infection in mice after  
599 exposure to coal dust and diesel engine emissions. *Environmental Research* 37, 44–  
600 60. [https://doi.org/10.1016/0013-9351\(85\)90048-9](https://doi.org/10.1016/0013-9351(85)90048-9)

601 Harapan, H., Itoh, N., Yufika, A., Winardi, W., Keam, S., Te, H., Megawati, D., Hayati, Z.,  
602 Wagner, A.L., Mudatsir, M., 2020. Coronavirus disease 2019 (COVID-19): A  
603 literature review. *Journal of Infection and Public Health* 13, 667–673.  
604 <https://doi.org/10.1016/j.jiph.2020.03.019>

605 Hatzianastassiou, N., Matsoukas, C., Fotiadi, A., Pavlakis, K.G., Drakakis, E.,  
606 Hatzidimitriou, D., Vardavas, I., 2005. Global distribution of Earth's surface  
607 shortwave radiation budget. *Atmos. Chem. Phys.* 21.

608 Hewson, E.W., Olsson, L.E., 1967. Lake Effects on Air Pollution Dispersion. *Journal of the*  
609 *Air Pollution Control Association* 17, 757–761.  
610 <https://doi.org/10.1080/00022470.1967.10469069>

611 Holshue, M.L., DeBolt, C., Lindquist, S., Lofy, K.H., Wiesman, J., Bruce, H., Spitters, C.,  
612 Ericson, K., Wilkerson, S., Tural, A., Diaz, G., Cohn, A., Fox, L., Patel, A., Gerber,  
613 S.I., Kim, L., Tong, S., Lu, X., Lindstrom, S., Pallansch, M.A., Weldon, W.C., Biggs,  
614 H.M., Uyeki, T.M., Pillai, S.K., 2020. First Case of 2019 Novel Coronavirus in the  
615 United States. *New England Journal of Medicine* 382, 929–936.  
616 <https://doi.org/10.1056/NEJMoa2001191>

617 Hong, H., Pradhan, B., Bui, D.T., Xu, C., Youssef, A.M., Chen, W., 2017. Comparison of  
618 four kernel functions used in support vector machines for landslide susceptibility  
619 mapping: a case study at Suichuan area (China). *Geomatics, Natural Hazards and Risk*  
620 8, 544–569. <https://doi.org/10.1080/19475705.2016.1250112>

621 Huang, C., Wang, Y., Li, X., Ren, L., Zhao, J., Hu, Y., Zhang, L., Fan, G., Xu, J., Gu, X.,  
622 Cheng, Z., Yu, T., Xia, J., Wei, Y., Wu, W., Xie, X., Yin, W., Li, H., Liu, M., Xiao,  
623 Y., Gao, H., Guo, L., Xie, J., Wang, G., Jiang, R., Gao, Z., Jin, Q., Wang, J., Cao, B.,  
624 2020a. Clinical features of patients infected with 2019 novel coronavirus in Wuhan,  
625 China. *The Lancet* 395, 497–506. [https://doi.org/10.1016/S0140-6736\(20\)30183-5](https://doi.org/10.1016/S0140-6736(20)30183-5)

626 Huang, H., Liang, X., Huang, J., Yuan, Z., Ouyang, H., Wei, Y., Bai, X., 2020b. Correlations  
627 between Meteorological Indicators, Air Quality and the COVID-19 Pandemic in 12



628 Cities across China. *J Environ Health Sci Engineer* 18, 1491–1498.  
629 <https://doi.org/10.1007/s40201-020-00564-y>  
630 Huang, Jing, Li, G., Xu, G., Qian, X., Zhao, Y., Pan, X., Huang, Jian, Cen, Z., Liu, Q., He,  
631 T., Guo, X., 2018. The burden of ozone pollution on years of life lost from chronic  
632 obstructive pulmonary disease in a city of Yangtze River Delta, China. *Environmental*  
633 *Pollution* 242, 1266–1273. <https://doi.org/10.1016/j.envpol.2018.08.021>  
634 Huang, N.-H., Wang, Q., Xu, D.-Q., 2008. Immunological effect of PM2.5 on cytokine  
635 production in female Wistar rats. *Biomed Environ Sci* 21, 63–68.  
636 [https://doi.org/10.1016/S0895-3988\(08\)60008-2](https://doi.org/10.1016/S0895-3988(08)60008-2)  
637 Hulin, M., Simoni, M., Viegi, G., Annesi-Maesano, I., 2012. Respiratory health and indoor  
638 air pollutants based on quantitative exposure assessments. *European Respiratory*  
639 *Journal* 40, 1033–1045. <https://doi.org/10.1183/09031936.00159011>  
640 Iqbal, N., Fareed, Z., Shahzad, F., He, X., Shahzad, U., Lina, M., 2020. The nexus between  
641 COVID-19, temperature and exchange rate in Wuhan city: New findings from partial  
642 and multiple wavelet coherence. *Science of The Total Environment* 729, 138916.  
643 <https://doi.org/10.1016/j.scitotenv.2020.138916>  
644 Islam, A.R.Md.T., Hasanuzzaman, Md., Azad, Md.A.K., Salam, R., Toshi, F.Z., Khan,  
645 Md.S.I., Alam, G.M.M., Ibrahim, S.M., 2020. Effect of meteorological factors on  
646 COVID-19 cases in Bangladesh. *Environ Dev Sustain.*  
647 <https://doi.org/10.1007/s10668-020-01016-1>  
648 Jacko, R., Breche, T.L., 2009. Air Pollution and Noise Control, in: *Environmental*  
649 *Engineering*. John Wiley & Sons, Ltd, pp. 309–393.  
650 <https://doi.org/10.1002/9780470432822.ch4>  
651 Jacob, D.J., 2000. Heterogeneous chemistry and tropospheric ozone. *Atmospheric*  
652 *Environment* 34, 2131–2159. [https://doi.org/10.1016/S1352-2310\(99\)00462-8](https://doi.org/10.1016/S1352-2310(99)00462-8)  
653 Jacobson, L. da S.V., Hacon, S. de S., Castro, H.A. de, Ignotti, E., Artaxo, P., Saldiva,  
654 P.H.N., Leon, A.C.M.P. de, 2014. Acute Effects of Particulate Matter and Black  
655 Carbon from Seasonal Fires on Peak Expiratory Flow of Schoolchildren in the  
656 Brazilian Amazon. *PLOS ONE* 9, e104177.  
657 <https://doi.org/10.1371/journal.pone.0104177>  
658 Jahangiri, Mehdi, Jahangiri, Milad, Najafgholipour, M., 2020. The sensitivity and specificity  
659 analyses of ambient temperature and population size on the transmission rate of the  
660 novel coronavirus (COVID-19) in different provinces of Iran. *Sci Total Environ* 728,  
661 138872. <https://doi.org/10.1016/j.scitotenv.2020.138872>  
662 Jain, M., Sharma, G.D., Goyal, M., Kaushal, R., Sethi, M., 2021. Econometric analysis of  
663 COVID-19 cases, deaths, and meteorological factors in South Asia. *Environ Sci*  
664 *Pollut Res* 28, 28518–28534. <https://doi.org/10.1007/s11356-021-12613-6>  
665 Jamil, T., Alam, I.S., Gojobori, T., Duarte, C., 2020. No Evidence for Temperature-  
666 Dependence of the COVID-19 Epidemic. *medRxiv* 2020.03.29.20046706.  
667 <https://doi.org/10.1101/2020.03.29.20046706>  
668 Jana, S., Gupta, A., Nath, A., 2020. Assessment of Global Performance on COVID-19  
669 Research during 1990-2019: An Exploratory Scientometric Analysis 19.  
670 Janssen, N.A.H., Hoek, G., Simic-Lawson, M., Fischer, P., van Bree, L., ten Brink, H.,  
671 Keuken, M., Atkinson, R.W., Anderson, H.R., Brunekreef, B., Cassee, F.R., 2011.  
672 Black Carbon as an Additional Indicator of the Adverse Health Effects of Airborne  
673 Particles Compared with PM10 and PM2.5. *Environ Health Perspect* 119, 1691–1699.  
674 <https://doi.org/10.1289/ehp.1003369>  
675 Jayamurugan, R., Kumaravel, B., Palanivelraja, S., Chockalingam, M.P., 2013. Influence of  
676 Temperature, Relative Humidity and Seasonal Variability on Ambient Air Quality in



677 a Coastal Urban Area. *International Journal of Atmospheric Sciences* 2013, e264046.  
678 <https://doi.org/10.1155/2013/264046>

679 Jebur, M.N., Pradhan, B., Tehrany, M.S., 2014. Manifestation of LiDAR-Derived Parameters  
680 in the Spatial Prediction of Landslides Using Novel Ensemble Evidential Belief  
681 Functions and Support Vector Machine Models in GIS. *IEEE J. Sel. Top. Appl. Earth*  
682 *Observations Remote Sensing* 8, 674–690.  
683 <https://doi.org/10.1109/JSTARS.2014.2341276>

684 Joshi, M., Pedersen, T., Maclin, R., 2005. A Comparative Study of Support Vector Machines  
685 Applied to the Supervised Word Sense Disambiguation Problem in the Medical  
686 Domain. Presented at the 2nd Indian International Conference on Artificial  
687 Intelligence (IICAI-05), pp. 3449–3468.

688 Jung, R.G., Di Santo, P., Clifford, C., Prosperi-Porta, G., Skanes, S., Hung, A., Parlow, S.,  
689 Visintini, S., Ramirez, F.D., Simard, T., Hibbert, B., 2021. Methodological quality of  
690 COVID-19 clinical research. *Nature Communications* 12, 943.  
691 <https://doi.org/10.1038/s41467-021-21220-5>

692 Kampa, M., Castanas, E., 2008. Human health effects of air pollution. *Environmental*  
693 *Pollution, Proceedings of the 4th International Workshop on Biomonitoring of*  
694 *Atmospheric Pollution (With Emphasis on Trace Elements)* 151, 362–367.  
695 <https://doi.org/10.1016/j.envpol.2007.06.012>

696 Karimian, H., Li, Q., Li, C., Jin, L., Fan, J., Li, Y., 2016. An Improved Method for  
697 Monitoring Fine Particulate Matter Mass Concentrations via Satellite Remote  
698 Sensing. *Aerosol Air Qual. Res.* 16, 1081–1092.  
699 <https://doi.org/10.4209/aaqr.2015.06.0424>

700 Kelly, M., Gillies, D., Todd, D.A., Lockwood, C., 2010. Heated humidification versus heat  
701 and moisture exchangers for ventilated adults and children. *Cochrane Database of*  
702 *Systematic Reviews*. <https://doi.org/10.1002/14651858.CD004711.pub2>

703 Kelsall, J.E., Samet, J.M., Zeger, S.L., Xu, J., 1997. Air Pollution and Mortality in  
704 Philadelphia, 1974–1988. *American Journal of Epidemiology* 146, 750–762.  
705 <https://doi.org/10.1093/oxfordjournals.aje.a009351>

706 Khaniabadi, Y.O., Hopke, P.K., Goudarzi, G., Daryanoosh, S.M., Jourvand, M., Basiri, H.,  
707 2017. Cardiopulmonary mortality and COPD attributed to ambient ozone.  
708 *Environmental Research* 152, 336–341. <https://doi.org/10.1016/j.envres.2016.10.008>

709 Khorramdelazad, H., Kazemi, M.H., Najafi, A., Keykhaee, M., Zolfaghari Enameh, R.,  
710 Falak, R., 2021. Immunopathological similarities between COVID-19 and influenza:  
711 Investigating the consequences of Co-infection. *Microb Pathog* 152, 104554.  
712 <https://doi.org/10.1016/j.micpath.2020.104554>

713 Kifer, D., Bugada, D., Villar-Garcia, J., Gudelj, I., Menni, C., Sudre, C., Vučković, F.,  
714 Ugrina, I., Lorini, L.F., Posso, M., Bettinelli, S., Ughi, N., Maloberti, A., Epis, O.,  
715 Giannattasio, C., Rossetti, C., Kalogjera, L., Peršec, J., Ollivere, L., Ollivere, B.J.,  
716 Yan, H., Cai, T., Aithal, G.P., Steves, C.J., Kantele, A., Kajova, M., Vapalahti, O.,  
717 Sajantila, A., Wojtowicz, R., Wierzbza, W., Krol, Z., Zaczynski, A., Zycinska, K.,  
718 Postula, M., Lukšić, I., Čivljak, R., Markotić, A., Brachmann, J., Markl, A.,  
719 Mahnkopf, C., Murray, B., Ourselin, S., Valdes, A.M., Horcajada, J.P., Castells, X.,  
720 Pascual, J., Allegri, M., Primorac, D., Spector, T.D., Barrios, C., Lauc, G., 2021.  
721 Effects of Environmental Factors on Severity and Mortality of COVID-19. *Front.*  
722 *Med.* 7. <https://doi.org/10.3389/fmed.2020.607786>

723 Kim, D., Chen, Z., Zhou, L.-F., Huang, S.-X., 2018. Air pollutants and early origins of  
724 respiratory diseases. *Chronic Dis Transl Med* 4, 75–94.  
725 <https://doi.org/10.1016/j.cdtm.2018.03.003>

Kim, J.W., Park, S., Lim, C.W., Lee, K., Kim, B., 2014. The Role of Air Pollutants in Initiating Liver Disease. *Toxicological Research* 30, 65–70. <https://doi.org/10.5487/TR.2014.30.2.065>

Kirwa, K., Eckert, C.M., Vedal, S., Hajat, A., Kaufman, J.D., 2021. Ambient air pollution and risk of respiratory infection among adults: evidence from the multiethnic study of atherosclerosis (MESA). *BMJ Open Respiratory Research* 8, e000866. <https://doi.org/10.1136/bmjresp-2020-000866>

Kudo, E., Song, E., Yockey, L.J., Rakib, T., Wong, P.W., Homer, R.J., Iwasaki, A., 2019. Low ambient humidity impairs barrier function and innate resistance against influenza infection. *PNAS* 116, 10905–10910. <https://doi.org/10.1073/pnas.1902840116>

Kumar, G., Kumar, R.R., 2020. A correlation study between meteorological parameters and COVID-19 pandemic in Mumbai, India. *Diabetes & Metabolic Syndrome: Clinical Research & Reviews* 14, 1735–1742. <https://doi.org/10.1016/j.dsx.2020.09.002>

Kumar, S., 2020. Effect of meteorological parameters on spread of COVID-19 in India and air quality during lockdown. *Sci Total Environ* 745, 141021. <https://doi.org/10.1016/j.scitotenv.2020.141021>

Kunz, C.U., Jörgens, S., Bretz, F., Stallard, N., Lancker, K.V., Xi, D., Zohar, S., Gerlinger, C., Friede, T., 2020. Clinical Trials Impacted by the COVID-19 Pandemic: Adaptive Designs to the Rescue? *Statistics in Biopharmaceutical Research* 12, 461–477. <https://doi.org/10.1080/19466315.2020.1799857>

Kurt, O.K., Zhang, J., Pinkerton, K.E., 2016. Pulmonary Health Effects of Air Pollution. *Curr Opin Pulm Med* 22, 138–143. <https://doi.org/10.1097/MCP.0000000000000248>

Kyung, S.Y., Jeong, S.H., 2020. Particulate-Matter Related Respiratory Diseases. *Tuberc Respir Dis (Seoul)* 83, 116–121. <https://doi.org/10.4046/trd.2019.0025>

Larsen, J.R., Martin, M.R., Martin, J.D., Kuhn, P., Hicks, J.B., 2020. Modeling the Onset of Symptoms of COVID-19. *Front. Public Health* 8. <https://doi.org/10.3389/fpubh.2020.00473>

Laumbach, R.J., Kipen, H.M., 2012. Respiratory Health Effects of Air Pollution: Update on Biomass Smoke and Traffic Pollution. *J Allergy Clin Immunol* 129, 3–13. <https://doi.org/10.1016/j.jaci.2011.11.021>

LaVoy, E.C.P., McFarlin, B.K., Simpson, R.J., 2011. Immune Responses to Exercising in a Cold Environment. *Wilderness & Environmental Medicine* 22, 343–351. <https://doi.org/10.1016/j.wem.2011.08.005>

Lee, A., Kinney, P., Chillrud, S., Jack, D., 2015. A Systematic Review of Innate Immunomodulatory Effects of Household Air Pollution Secondary to the Burning of Biomass Fuels. *Annals of Global Health* 81, 368. <https://doi.org/10.1016/j.aogh.2015.08.006>

Li, C., Bosch, C., Kang, S., Andersson, A., Chen, P., Zhang, Q., Cong, Z., Chen, B., Qin, D., Gustafsson, Ö., 2016. Sources of black carbon to the Himalayan–Tibetan Plateau glaciers. *Nature Communications* 7, 12574. <https://doi.org/10.1038/ncomms12574>

Li, H., Xu, X.-L., Dai, D.-W., Huang, Z.-Y., Ma, Z., Guan, Y.-J., 2020. Air pollution and temperature are associated with increased COVID-19 incidence: A time series study. *International Journal of Infectious Diseases* 97, 278–282. <https://doi.org/10.1016/j.ijid.2020.05.076>

Li, P., Wang, Y., Peppelenbosch, M.P., Ma, Z., Pan, Q., 2021. Systematically comparing COVID-19 with the 2009 influenza pandemic for hospitalized patients. *Int J Infect Dis* 102, 375–380. <https://doi.org/10.1016/j.ijid.2020.11.127>

Li, R., Gong, J., Chen, L., Wang, Z., 2015. Estimating Ground-Level PM<sub>2.5</sub> Using Fine-Resolution Satellite Data in the Megacity of Beijing, China. *Aerosol Air Qual. Res.* 15, 1347–1356. <https://doi.org/10.4209/aaqr.2015.01.0009>

776 Lin, S., Wei, D., Sun, Y., Chen, K., Yang, L., Liu, B., Huang, Q., Paoliello, M.M.B., Li, H.,  
777 Wu, S., 2020. Region-specific air pollutants and meteorological parameters influence  
778 COVID-19: A study from mainland China. *Ecotoxicology and Environmental Safety*  
779 204, 111035. <https://doi.org/10.1016/j.ecoenv.2020.111035>

780 Liu, B., Taioli, E., 2015. Seasonal Variations of Complete Blood Count and Inflammatory  
781 Biomarkers in the US Population - Analysis of NHANES Data. *PLoS One* 10.  
782 <https://doi.org/10.1371/journal.pone.0142382>

783 Liu, H., Fan, X., Wang, N., Zhang, Y., Yu, J., 2017. Exacerbating effects of PM2.5 in OVA-  
784 sensitized and challenged mice and the expression of TRPA1 and TRPV1 proteins in  
785 lungs. *Journal of Asthma* 54, 807–817.  
786 <https://doi.org/10.1080/02770903.2016.1266495>

787 Liu, H., Liu, S., Xue, B., Lv, Z., Meng, Z., Yang, X., Xue, T., Yu, Q., He, K., 2018. Ground-  
788 level ozone pollution and its health impacts in China. *Atmospheric Environment* 173,  
789 223–230. <https://doi.org/10.1016/j.atmosenv.2017.11.014>

790 Liu, J., Zhou, J., Yao, J., Zhang, X., Li, L., Xu, X., He, X., Wang, B., Fu, S., Niu, T., Yan, J.,  
791 Shi, Y., Ren, X., Niu, J., Zhu, W., Li, S., Luo, B., Zhang, K., 2020b. Impact of  
792 meteorological factors on the COVID-19 transmission: A multi-city study in China.  
793 *Science of The Total Environment* 726, 138513.  
794 <https://doi.org/10.1016/j.scitotenv.2020.138513>

795 Liu, Q., Tan, Z.-M., Sun, J., Hou, Y., Fu, C., Wu, Z., 2020c. Changing rapid weather  
796 variability increases influenza epidemic risk in a warming climate. *Environ. Res. Lett.*  
797 15, 044004. <https://doi.org/10.1088/1748-9326/ab70bc>

798 Liu, T., Hu, J., Xiao, J., He, G., Kang, M., Rong, Z., Lin, L., Zhong, H., Huang, Q., Deng, A.,  
799 Zeng, W., Tan, X., Zeng, S., Zhu, Z., Li, J., Gong, D., Wan, D., Chen, S., Guo, L., Li,  
800 Y., Sun, L., Liang, W., Song, T., He, J., Ma, W., 2020a. Time-varying transmission  
801 dynamics of Novel Coronavirus Pneumonia in China. *bioRxiv* 2020.01.25.919787.  
802 <https://doi.org/10.1101/2020.01.25.919787>

803 Liu, Yanli, Sun, W., Guo, Y., Chen, L., Zhang, L., Zhao, S., Long, D., Yu, L., 2020d.  
804 Association between platelet parameters and mortality in coronavirus disease 2019:  
805 Retrospective cohort study. *Platelets* 1–7.  
806 <https://doi.org/10.1080/09537104.2020.1754383>

807 Liu, Yansui, Zhou, Y., Lu, J., 2020e. Exploring the relationship between air pollution and  
808 meteorological conditions in China under environmental governance. *Sci Rep* 10,  
809 14518. <https://doi.org/10.1038/s41598-020-71338-7>

810 Logan, J.A., Prather, M.J., Wofsy, S.C., McElroy, M.B., 1981. Tropospheric chemistry: A  
811 global perspective. *Journal of Geophysical Research: Oceans* 86, 7210–7254.  
812 <https://doi.org/10.1029/JC086iC08p07210>

813 Lowen, A.C., Mubareka, S., Steel, J., Palese, P., 2007. Influenza Virus Transmission Is  
814 Dependent on Relative Humidity and Temperature. *PLOS Pathogens* 3, e151.  
815 <https://doi.org/10.1371/journal.ppat.0030151>

816 Lytle, C.D., Sagripanti, J.-L., 2005. Predicted Inactivation of Viruses of Relevance to  
817 Biodefense by Solar Radiation. *Journal of Virology* 79, 14244–14252.  
818 <https://doi.org/10.1128/JVI.79.22.14244-14252.2005>

819 Ma, Y., Cheng, B., Shen, J., Wang, H., Feng, F., Zhang, Y., Jiao, H., 2021. Association  
820 between environmental factors and COVID-19 in Shanghai, China. *Environ Sci Pollut*  
821 *Res Int* 1–9. <https://doi.org/10.1007/s11356-021-13834-5>

822 Ma, Y., Zhao, Y., Liu, J., He, X., Wang, B., Fu, S., Yan, J., Niu, J., Zhou, J., Luo, B., 2020.  
823 Effects of temperature variation and humidity on the death of COVID-19 in Wuhan,  
824 China. *Science of The Total Environment* 724, 138226.  
825 <https://doi.org/10.1016/j.scitotenv.2020.138226>

826 Maaoui, C., Pruski, A., 2008. A comparative study of SVM kernel applied to emotion  
827 recognition from physiological signals, in: 2008 5th International Multi-Conference  
828 on Systems, Signals and Devices. Presented at the 2008 5th International Multi-  
829 Conference on Systems, Signals and Devices, pp. 1–6.  
830 <https://doi.org/10.1109/SSD.2008.4632891>

831 Mahapatra, P.S., Puppala, S.P., Adhikary, B., Shrestha, K.L., Dawadi, D.P., Paudel, S.P.,  
832 Panday, A.K., 2019. Air quality trends of the Kathmandu Valley: A satellite,  
833 observation and modeling perspective. *Atmospheric Environment* 201, 334–347.  
834 <https://doi.org/10.1016/j.atmosenv.2018.12.043>

835 Manisalidis, I., Stavropoulou, E., Stavropoulos, A., Bezirtzoglou, E., 2020. Environmental  
836 and Health Impacts of Air Pollution: A Review. *Front Public Health* 8.  
837 <https://doi.org/10.3389/fpubh.2020.00014>

838 Mansouri Daneshvar, M.R., Ebrahimi, M., Sadeghi, A., Mahmoudzadeh, A., 2021. Climate  
839 effects on the COVID-19 outbreak: a comparative analysis between the UAE and  
840 Switzerland. *Model. Earth Syst. Environ.* <https://doi.org/10.1007/s40808-021-01110-x>

841 Matthew, O.J., Eludoyin, A.O., Oluwadiya, K.S., 2021. Spatio-temporal variations in  
842 COVID-19 in relation to the global climate distribution and fluctuations. *Spatial and*  
843 *Spatio-temporal Epidemiology* 37, 100417. <https://doi.org/10.1016/j.sste.2021.100417>

844 Mecnas, P., Bastos, R.T. da R.M., Vallinoto, A.C.R., Normando, D., 2020. Effects of  
845 temperature and humidity on the spread of COVID-19: A systematic review. *PLOS*  
846 *ONE* 15, e0238339. <https://doi.org/10.1371/journal.pone.0238339>

847 Mehmood, K., Bao, Y., Abrar, M.M., Petropoulos, G.P., Saifullah, Soban, A., Saud, S.,  
848 Khan, Z.A., Khan, S.M., Fahad, S., 2021. Spatiotemporal variability of COVID-19  
849 pandemic in relation to air pollution, climate and socioeconomic factors in Pakistan.  
850 *Chemosphere* 271, 129584. <https://doi.org/10.1016/j.chemosphere.2021.129584>

851 Mehta, S., Shin, H., Burnett, R., North, T., Cohen, A.J., 2013. Ambient particulate air  
852 pollution and acute lower respiratory infections: a systematic review and implications  
853 for estimating the global burden of disease. *Air Qual Atmos Health* 6, 69–83.  
854 <https://doi.org/10.1007/s11869-011-0146-3>

855 Mele, M., Magazzino, C., Schneider, N., Strezov, V., 2021. NO<sub>2</sub> levels as a contributing  
856 factor to COVID-19 deaths: The first empirical estimate of threshold values.  
857 *Environmental Research* 194, 110663. <https://doi.org/10.1016/j.envres.2020.110663>

858 Menebo, M.M., 2020. Temperature and precipitation associate with Covid-19 new daily  
859 cases: A correlation study between weather and Covid-19 pandemic in Oslo, Norway.  
860 *Science of The Total Environment* 737, 139659.  
861 <https://doi.org/10.1016/j.scitotenv.2020.139659>

862 Mollalo, A., Vahedi, B., Rivera, K.M., 2020. GIS-based spatial modeling of COVID-19  
863 incidence rate in the continental United States. *Science of The Total Environment*  
864 728, 138884. <https://doi.org/10.1016/j.scitotenv.2020.138884>

865 Moniruzzam, M., Roy, A., Bhatt, C.M., Gupta, A., An, N.T.T., Hassan, M.R., 2018. Impact  
866 Analysis of Urbanization on Land Use Land Cover Change for Khulna City,  
867 Bangladesh using Temporal Landsat Imagery. *Int. Arch. Photogramm. Remote Sens.*  
868 *Spatial Inf. Sci. XLII–5*, 757–760. [https://doi.org/10.5194/isprs-archives-XLII-5-757-](https://doi.org/10.5194/isprs-archives-XLII-5-757-2018)  
869 2018

870 Moore, M., Little, P., 2007. Humidified air inhalation for treating croup: a systematic review  
871 and meta-analysis. *Family Practice* 24, 295–301.  
872 <https://doi.org/10.1093/fampra/cmm022>

873 Moriyama, M., Ichinohe, T., 2019. High ambient temperature dampens adaptive immune  
874 responses to influenza A virus infection. *PNAS* 116, 3118–3125.  
875 <https://doi.org/10.1073/pnas.1815029116>



876 Munawar, M.E., 2018. Human health and environmental impacts of coal combustion  
877 and post-combustion wastes. *Journal of Sustainable Mining* 17, 87–96.  
878 <https://doi.org/10.1016/j.jsm.2017.12.007>

879 Nanda, C., Kant, Y., Gupta, A., Mitra, D., 2018. Spatio-Temporal Distribution of Pollutant  
880 Trace Gases During Diwali Over India. *ISPRS Ann. Photogramm. Remote Sens.*  
881 *Spatial Inf. Sci. IV–5*, 339–350. <https://doi.org/10.5194/isprs-annals-IV-5-339-2018>

882 Naqvi, H.R., Datta, M., Mutreja, G., Siddiqui, M.A., Naqvi, D.F., Naqvi, A.R., 2021.  
883 Improved air quality and associated mortalities in India under COVID-19 lockdown.  
884 *Environ Pollut* 268, 115691. <https://doi.org/10.1016/j.envpol.2020.115691>

885 Nicholson, L.B., 2016. The immune system. *Essays Biochem* 60, 275–301.  
886 <https://doi.org/10.1042/EBC20160017>

887 Nigam, R., Pandya, K., Luis, A.J., Sengupta, R., Kotha, M., 2021. Positive effects of  
888 COVID-19 lockdown on air quality of industrial cities (Ankleshwar and Vapi) of  
889 Western India. *Sci Rep* 11, 4285. <https://doi.org/10.1038/s41598-021-83393-9>

890 Nottmeyer, L.N., Sera, F., 2021. Influence of temperature, and of relative and absolute  
891 humidity on COVID-19 incidence in England - A multi-city time-series study.  
892 *Environ Res* 196, 110977. <https://doi.org/10.1016/j.envres.2021.110977>

893 Nuvolone, D., Petri, D., Voller, F., 2018. The effects of ozone on human health. *Environ Sci*  
894 *Pollut Res* 25, 8074–8088. <https://doi.org/10.1007/s11356-017-9239-3>

895 Oliveiros, B., Caramelo, L., Ferreira, N.C., Caramelo, F., 2020. Role of temperature and  
896 humidity in the modulation of the doubling time of COVID-19 cases. *medRxiv*  
897 2020.03.05.20031872. <https://doi.org/10.1101/2020.03.05.20031872>

898 Orru, H., Ebi, K.L., Forsberg, B., 2017. The Interplay of Climate Change and Air Pollution  
899 on Health. *Curr Envir Health Rpt* 4, 504–513. <https://doi.org/10.1007/s40572-017-0168-6>

900

901 Pan, Y.-P., Zhu, X.-Y., Tian, S.-L., Wang, L.-L., Zhang, G.-Z., Zhou, Y.-B., Xu, P., Hu, B.,  
902 Wang, Y.-S., 2017. Wet deposition and scavenging ratio of air pollutants during an  
903 extreme rainstorm in the North China Plain. *Atmospheric and Oceanic Science Letters*  
904 10, 348–353. <https://doi.org/10.1080/16742834.2017.1343084>

905 Pandey, S.K., Vinoj, V., Landu, K., Babu, S.S., 2017. Declining pre-monsoon dust loading  
906 over South Asia: Signature of a changing regional climate. *Sci Rep* 7, 16062.  
907 <https://doi.org/10.1038/s41598-017-16338-w>

908 Pani, S.K., Lin, N.-H., RavindraBabu, S., 2020. Association of COVID-19 pandemic with  
909 meteorological parameters over Singapore. *Science of The Total Environment* 740,  
910 140112. <https://doi.org/10.1016/j.scitotenv.2020.140112>

911 Panofsky, H.A., Prasad, B., 1967. The Effect of Meteorological Factors on Air Pollution in a  
912 Narrow Valley. *Journal of Applied Meteorology and Climatology* 6, 493–499.  
913 [https://doi.org/10.1175/1520-0450\(1967\)006<0493:TEOMFO>2.0.CO;2](https://doi.org/10.1175/1520-0450(1967)006<0493:TEOMFO>2.0.CO;2)

914 Pansini, R., Fornacca, D., 2020. COVID-19 higher induced mortality in Chinese regions with  
915 lower air quality. *medRxiv* 2020.04.04.20053595.  
916 <https://doi.org/10.1101/2020.04.04.20053595>

917 Paulin, L., Hansel, N., 2016. Particulate air pollution and impaired lung function. *F1000Res*  
918 5, 201. <https://doi.org/10.12688/f1000research.7108.1>

919 Paunescu, A.-C., Casas, M., Ferrero, A., Pañella, P., Bougas, N., Beydon, N., Just, J., Lezmi,  
920 G., Sunyer, J., Ballester, F., Momas, I., 2019. Associations of black carbon with lung  
921 function and airway inflammation in schoolchildren. *Environment International* 131,  
922 104984. <https://doi.org/10.1016/j.envint.2019.104984>

923 Perlman, S., 2020. Another Decade, Another Coronavirus. *New England Journal of Medicine*  
924 382, 760–762. <https://doi.org/10.1056/NEJMe2001126>



925 Peters, A., Dockery, D.W., Muller, J.E., Mittleman, M.A., 2001. Increased Particulate Air  
926 Pollution and the Triggering of Myocardial Infarction. *Circulation* 103, 2810–2815.  
927 <https://doi.org/10.1161/01.CIR.103.23.2810>

928 Pica, N., Bouvier, N.M., 2012. Environmental factors affecting the transmission of  
929 respiratory viruses. *Curr Opin Virol* 2, 90–95.  
930 <https://doi.org/10.1016/j.coviro.2011.12.003>

931 Power, G.G., 1968. Solubility of O<sub>2</sub> and CO in blood and pulmonary and placental tissue.  
932 *Journal of Applied Physiology* 24, 468–474.  
933 <https://doi.org/10.1152/jappl.1968.24.4.468>

934 Prabhu, V., Soni, A., Madhwal, S., Gupta, A., Sundriyal, S., Shridhar, V., Sreekanth, V.,  
935 Mahapatra, P.S., 2020. Black carbon and biomass burning associated high pollution  
936 episodes observed at Doon valley in the foothills of the Himalayas. *Atmospheric*  
937 *Research* 243, 105001. <https://doi.org/10.1016/j.atmosres.2020.105001>

938 Price, R.H.M., Graham, C., Ramalingam, S., 2019. Association between viral seasonality and  
939 meteorological factors. *Scientific Reports* 9, 929. [https://doi.org/10.1038/s41598-018-](https://doi.org/10.1038/s41598-018-37481-y)  
940 [37481-y](https://doi.org/10.1038/s41598-018-37481-y)

941 Qi, H., Xiao, S., Shi, R., Ward, M.P., Chen, Y., Tu, W., Su, Q., Wang, W., Wang, X., Zhang,  
942 Z., 2020. COVID-19 transmission in Mainland China is associated with temperature  
943 and humidity: A time-series analysis. *Science of The Total Environment* 728, 138778.  
944 <https://doi.org/10.1016/j.scitotenv.2020.138778>

945 Qin, Y.-G., Yi, C., Dong, G.-L., Min, J.-Z., 2020. Investigating the influence of  
946 meteorological factors on particulate matters: A case study based on path analysis.  
947 *Energy & Environment* 31, 479–491. <https://doi.org/10.1177/0958305X19876696>

948 Rendana, M., 2020. Impact of the wind conditions on COVID-19 pandemic: A new insight  
949 for direction of the spread of the virus. *Urban Clim* 34, 100680.  
950 <https://doi.org/10.1016/j.uclim.2020.100680>

951 Roldán-Henao, N., Hoyos, C.D., Herrera-Mejía, L., Isaza, A., 2020. An Investigation of the  
952 Precipitation Net Effect on the Particulate Matter Concentration in a Narrow Valley:  
953 Role of Lower-Troposphere Stability. *Journal of Applied Meteorology and*  
954 *Climatology* 59, 401–426. <https://doi.org/10.1175/JAMC-D-18-0313.1>

955 Rosario, D.K.A., Mutz, Y.S., Bernardes, P.C., Conte-Junior, C.A., 2020. Relationship  
956 between COVID-19 and weather: Case study in a tropical country. *International*  
957 *Journal of Hygiene and Environmental Health* 229, 113587.  
958 <https://doi.org/10.1016/j.ijheh.2020.113587>

959 Rosenthal, F.S., Kuisma, M., Lanki, T., Hussein, T., Boyd, J., Halonen, J.I., Pekkanen, J.,  
960 2013. Association of ozone and particulate air pollution with out-of-hospital cardiac  
961 arrest in Helsinki, Finland: Evidence for two different etiologies. *Journal of Exposure*  
962 *Science & Environmental Epidemiology* 23, 281–288.  
963 <https://doi.org/10.1038/jes.2012.121>

964 Rousta, I., Olafsson, H., Moniruzzaman, M., Zhang, H., Liou, Y.-A., Mushore, T.D., Gupta,  
965 A., 2020. Impacts of Drought on Vegetation Assessed by Vegetation Indices and  
966 Meteorological Factors in Afghanistan. *Remote Sensing* 12, 2433.  
967 <https://doi.org/10.3390/rs12152433>

968 Rume, T., Islam, S.M.D.-U., 2020. Environmental effects of COVID-19 pandemic and  
969 potential strategies of sustainability. *Heliyon* 6.  
970 <https://doi.org/10.1016/j.heliyon.2020.e04965>

971 Runkle, J.D., Sugg, M.M., Leeper, R.D., Rao, Y., Matthews, J.L., Rennie, J.J., 2020. Short-  
972 term effects of specific humidity and temperature on COVID-19 morbidity in select  
973 US cities. *Sci Total Environ* 740, 140093.  
974 <https://doi.org/10.1016/j.scitotenv.2020.140093>

975 Saadat, S., Rawtani, D., Hussain, C.M., 2020. Environmental perspective of COVID-19.  
 976 Science of The Total Environment 728, 138870.  
 977 <https://doi.org/10.1016/j.scitotenv.2020.138870>

978 Şahin, M., 2020. Impact of weather on COVID-19 pandemic in Turkey. Science of The Total  
 979 Environment 728, 138810. <https://doi.org/10.1016/j.scitotenv.2020.138810>

980 Saikawa, E., Panday, A., Kang, S., Gautam, R., Zusman, E., Cong, Z., Somanathan, E.,  
 981 Adhikary, B., 2019. Air Pollution in the Hindu Kush Himalaya, in: Wester, P.,  
 982 Mishra, A., Mukherji, A., Shrestha, A.B. (Eds.), The Hindu Kush Himalaya  
 983 Assessment: Mountains, Climate Change, Sustainability and People. Springer  
 984 International Publishing, Cham, pp. 339–387. [https://doi.org/10.1007/978-3-319-92288-1\\_10](https://doi.org/10.1007/978-3-319-92288-1_10)

985

986 Sajadi, M.M., Habibzadeh, P., Vintzileos, A., Shokouhi, S., Miralles-Wilhelm, F., Amoroso,  
 987 A., 2020. Temperature, Humidity, and Latitude Analysis to Estimate Potential Spread  
 988 and Seasonality of Coronavirus Disease 2019 (COVID-19). JAMA Netw Open 3,  
 989 e2011834. <https://doi.org/10.1001/jamanetworkopen.2020.11834>

990 Saliba, N.A., El Jam, F., El Tayar, G., Obeid, W., Roumie, M., 2010. Origin and variability  
 991 of particulate matter (PM10 and PM2.5) mass concentrations over an Eastern  
 992 Mediterranean city. Atmospheric Research 97, 106–114.  
 993 <https://doi.org/10.1016/j.atmosres.2010.03.011>

994 Sangkham, S., Thongtip, S., Vongruang, P., 2021. Influence of air pollution and  
 995 meteorological factors on the spread of COVID-19 in the Bangkok Metropolitan  
 996 Region and air quality during the outbreak. Environ Res 197, 111104.  
 997 <https://doi.org/10.1016/j.envres.2021.111104>

998 Sario, M.D., Katsouyanni, K., Michelozzi, P., 2013. Climate change, extreme weather events,  
 999 air pollution and respiratory health in Europe. European Respiratory Journal 42, 826–  
 1000 843. <https://doi.org/10.1183/09031936.00074712>

1001 Sarkodie, S.A., Owusu, P.A., 2020. Impact of meteorological factors on COVID-19  
 1002 pandemic: Evidence from top 20 countries with confirmed cases. Environmental  
 1003 Research 191, 110101. <https://doi.org/10.1016/j.envres.2020.110101>

1004 Sathian, B., Asim, M., Banerjee, I., Pizarro, A.B., Roy, B., van Teijlingen, E.R., do  
 1005 Nascimento, I.J.B., Alhamad, H.K., 2020. Impact of COVID-19 on clinical trials and  
 1006 clinical research: A systematic review. Nepal J Epidemiol 10, 878–887.  
 1007 <https://doi.org/10.3126/nje.v10i3.31622>

1008 Schmidt, C.W., 2011. Black Carbon: The Dark Horse of Climate Change Drivers. Environ  
 1009 Health Perspect 119, A172–A175.

1010 Schraufnagel, D.E., Balmes, J.R., Cowl, C.T., Matteis, S.D., Jung, S.-H., Mortimer, K.,  
 1011 Perez-Padilla, R., Rice, M.B., Riojas-Rodriguez, H., Sood, A., Thurston, G.D., To, T.,  
 1012 Vanker, A., Wuebbles, D.J., 2019. Air Pollution and Noncommunicable Diseases: A  
 1013 Review by the Forum of International Respiratory Societies' Environmental  
 1014 Committee, Part 1: The Damaging Effects of Air Pollution. CHEST 155, 409–416.  
 1015 <https://doi.org/10.1016/j.chest.2018.10.042>

1016 Segersson, D., Eneroth, K., Gidhagen, L., Johansson, C., Omstedt, G., Engström Nylén, A.,  
 1017 Forsberg, B., 2017. Health Impact of PM10, PM2.5 and Black Carbon Exposure Due  
 1018 to Different Source Sectors in Stockholm, Gothenburg and Umea, Sweden. Int J  
 1019 Environ Res Public Health 14. <https://doi.org/10.3390/ijerph14070742>

1020 Selcuk, M., Gormus, S., Guven, M., 2021. Impact of Weather Parameters and Population  
 1021 Density on the COVID-19 Transmission: Evidence from 81 Provinces of Turkey.  
 1022 Earth Syst Environ 5, 87–100. <https://doi.org/10.1007/s41748-020-00197-z>

1023 Seo, J., Park, D.-S.R., Kim, J.Y., Youn, D., Lim, Y.B., Kim, Y., 2018. Effects of  
 1024 meteorology and emissions on urban air quality: a quantitative statistical approach to

1025 long-term records (1999–2016) in Seoul, South Korea. *Atmos. Chem. Phys.* 18,  
1026 16121–16137. <https://doi.org/10.5194/acp-18-16121-2018>

1027 Shahri, M.K., Niazkar, H.R., Rad, F., 2021. COVID-19 and hematology findings based on  
1028 the current evidences: A puzzle with many missing pieces. *International Journal of*  
1029 *Laboratory Hematology* 43, 160–168. <https://doi.org/10.1111/ijlh.13412>

1030 Shakil, M.H., Munim, Z.H., Tasnia, M., Sarowar, S., 2020. COVID-19 and the environment:  
1031 A critical review and research agenda. *Science of The Total Environment* 745,  
1032 141022. <https://doi.org/10.1016/j.scitotenv.2020.141022>

1033 Sharma, G.D., Bansal, S., Yadav, A., Jain, M., Garg, I., 2021. Meteorological factors,  
1034 COVID-19 cases, and deaths in top 10 most affected countries: an econometric  
1035 investigation. *Environ Sci Pollut Res.* <https://doi.org/10.1007/s11356-021-12668-5>

1036 Shi, P., Dong, Y., Yan, H., Zhao, C., Li, X., Liu, W., He, M., Tang, S., Xi, S., 2020. Impact  
1037 of temperature on the dynamics of the COVID-19 outbreak in China. *Science of The*  
1038 *Total Environment* 728, 138890. <https://doi.org/10.1016/j.scitotenv.2020.138890>

1039 Shukla, J.B., Misra, A.K., Sundar, S., Naresh, R., 2008. Effect of rain on removal of a  
1040 gaseous pollutant and two different particulate matters from the atmosphere of a city.  
1041 *Mathematical and Computer Modelling* 48, 832–844.  
1042 <https://doi.org/10.1016/j.mcm.2007.10.016>

1043 Sil, A., Kumar, V.N., 2020. Does weather affect the growth rate of COVID-19, a study to  
1044 comprehend transmission dynamics on human health. *Journal of Safety Science and*  
1045 *Resilience* 1, 3–11. <https://doi.org/10.1016/j.jnlssr.2020.06.004>

1046 Singh, R.P., Chauhan, A., 2020. Impact of lockdown on air quality in India during COVID-  
1047 19 pandemic. *Air Qual Atmos Health* 1–8. <https://doi.org/10.1007/s11869-020-00863-1>

1048 1

1049 Smola, A.J., Schölkopf, B., 2004. A tutorial on support vector regression. *Statistics and*  
1050 *Computing* 14, 199–222. <https://doi.org/10.1023/B:STCO.0000035301.49549.88>

1051 Song, S., Zhan, Z., Long, Z., Zhang, J., Yao, L., 2011. Comparative study of SVM methods  
1052 combined with voxel selection for object category classification on fMRI data. *PLoS*  
1053 *One* 6, e17191. <https://doi.org/10.1371/journal.pone.0017191>

1054 Spekreijse, D., Bouma, A., Koch, G., Stegeman, A., 2013. Quantification of dust-borne  
1055 transmission of highly pathogenic avian influenza virus between chickens. *Influenza*  
1056 *Other Respir Viruses* 7, 132–138. <https://doi.org/10.1111/j.1750-2659.2012.00362.x>

1057 Steffens, I., 2020. A hundred days into the coronavirus disease (COVID-19) pandemic.  
1058 *Eurosurveillance* 25, 2000550. <https://doi.org/10.2807/1560-7917.ES.2020.25.14.2000550>

1059 7917.ES.2020.25.14.2000550

1060 Suhaimi, N.F., Jalaludin, J., 2015. Biomarker as a research tool in linking exposure to air  
1061 particles and respiratory health. *Biomed Res Int* 2015, 962853.  
1062 <https://doi.org/10.1155/2015/962853>

1063 Suhaimi, N.F., Jalaludin, J., Latif, M.T., 2020. Demystifying a Possible Relationship between  
1064 COVID-19, Air Quality and Meteorological Factors: Evidence from Kuala Lumpur,  
1065 Malaysia. *Aerosol Air Qual. Res.* 20, 1520–1529.  
1066 <https://doi.org/10.4209/aaqr.2020.05.0218>

1067 Sun, Z., Thilakavathy, K., Kumar, S.S., He, G., Liu, S.V., 2020. Potential Factors Influencing  
1068 Repeated SARS Outbreaks in China. *International Journal of Environmental Research*  
1069 *and Public Health* 17, 1633. <https://doi.org/10.3390/ijerph17051633>

1070 Suryadhi, M.A.H., Abudureyimu, K., Kashima, S., Yorifuji, T., 2020. Nitrogen dioxide and  
1071 acute respiratory tract infections in children in Indonesia. *Arch Environ Occup Health*  
1072 75, 274–280. <https://doi.org/10.1080/19338244.2019.1631245>

1073 Tan, J., Mu, L., Huang, J., Yu, S., Chen, B., Yin, J., 2005. An initial investigation of the  
1074 association between the SARS outbreak and weather: with the view of the

1075 environmental temperature and its variation. *J Epidemiol Community Health* 59, 186–  
1076 192. <https://doi.org/10.1136/jech.2004.020180>

1077 Tang, S., Mao, Y., Jones, R.M., Tan, Q., Ji, J.S., Li, N., Shen, J., Lv, Y., Pan, L., Ding, P.,  
1078 Wang, X., Wang, Y., MacIntyre, C.R., Shi, X., 2020. Aerosol transmission of SARS-  
1079 CoV-2? Evidence, prevention and control. *Environment International* 144, 106039.  
1080 <https://doi.org/10.1016/j.envint.2020.106039>

1081 Tellier, R., 2006. Review of aerosol transmission of influenza A virus. *Emerg Infect Dis* 12,  
1082 1657–1662. <https://doi.org/10.3201/eid1211.060426>

1083 Thompson, A.M., 1992. The Oxidizing Capacity of the Earth's Atmosphere: Probable Past  
1084 and Future Changes. *Science* 256, 1157–1165.  
1085 <https://doi.org/10.1126/science.256.5060.1157>

1086 Thurston, G.D., Kipen, H., Annesi-Maesano, I., Balmes, J., Brook, R.D., Cromar, K., De  
1087 Matteis, S., Forastiere, F., Forsberg, B., Frampton, M.W., Grigg, J., Heederik, D.,  
1088 Kelly, F.J., Kuenzli, N., Laumbach, R., Peters, A., Rajagopalan, S.T., Rich, D., Ritz,  
1089 B., Samet, J.M., Sandstrom, T., Sigsgaard, T., Sunyer, J., Brunekreef, B., 2017. A  
1090 joint ERS/ATS policy statement: what constitutes an adverse health effect of air  
1091 pollution? An analytical framework. *Eur Respir J* 49.  
1092 <https://doi.org/10.1183/13993003.00419-2016>

1093 Tien Bui, D., Pradhan, B., Lofman, O., Revhaug, I., 2012. Landslide Susceptibility  
1094 Assessment in Vietnam Using Support Vector Machines, Decision Tree, and Naïve  
1095 Bayes Models [WWW Document]. *Mathematical Problems in Engineering*.  
1096 <https://doi.org/10.1155/2012/974638>

1097 Tobias, A., Karanasiou, A., Reche, C., Amato, F., Alastuey, A., Querol, X., 2014. Effects of  
1098 black carbon on respiratory health in the city of Barcelona. *European Respiratory*  
1099 *Journal* 44.

1100 Tosepu, R., Gunawan, J., Effendy, D.S., Ahmad, L.O.A.I., Lestari, H., Bahar, H., Asfian, P.,  
1101 2020. Correlation between weather and Covid-19 pandemic in Jakarta, Indonesia.  
1102 *Science of The Total Environment* 725, 138436.  
1103 <https://doi.org/10.1016/j.scitotenv.2020.138436>

1104 Turner, M.C., Jerrett, M., Pope, C.A., Krewski, D., Gapstur, S.M., Diver, W.R., Beckerman,  
1105 B.S., Marshall, J.D., Su, J., Crouse, D.L., Burnett, R.T., 2015. Long-Term Ozone  
1106 Exposure and Mortality in a Large Prospective Study. *Am J Respir Crit Care Med*  
1107 193, 1134–1142. <https://doi.org/10.1164/rccm.201508-1633OC>

1108 Tuttle, K.R., 2020. Impact of the COVID-19 pandemic on clinical research. *Nature Reviews*  
1109 *Nephrology* 16, 562–564. <https://doi.org/10.1038/s41581-020-00336-9>

1110 Urman, R., McConnell, R., Islam, T., Avol, E.L., Lurmann, F.W., Vora, H., Linn, W.S.,  
1111 Rappaport, E.B., Gilliland, F.D., Gauderman, W.J., 2014. Associations of children's  
1112 lung function with ambient air pollution: joint effects of regional and near-roadway  
1113 pollutants. *Thorax* 69, 540–547. <https://doi.org/10.1136/thoraxjnl-2012-203159>

1114 VALAVANIDIS, A., FIOTAKIS, K., VLACHOGIANNI, T., 2008. Airborne Particulate  
1115 Matter and Human Health: Toxicological Assessment and Importance of Size and  
1116 Composition of Particles for Oxidative Damage and Carcinogenic Mechanisms.  
1117 *Journal of Environmental Science and Health, Part C* 26, 339–362.  
1118 <https://doi.org/10.1080/10590500802494538>

1119 Valko, M., Leibfritz, D., Moncol, J., Cronin, M.T.D., Mazur, M., Telser, J., 2007. Free  
1120 radicals and antioxidants in normal physiological functions and human disease. *The*  
1121 *International Journal of Biochemistry & Cell Biology* 39, 44–84.  
1122 <https://doi.org/10.1016/j.biocel.2006.07.001>

1123 Vapnik, V., Golowich, S.E., Smola, A.J., 1997. Support Vector Method for Function  
1124 Approximation, Regression Estimation and Signal Processing 7.



1125 Vapnik, V.N., 1995. The Nature of Statistical Learning Theory. Springer New York, New  
1126 York, NY. <https://doi.org/10.1007/978-1-4757-2440-0>

1127 Vautard, R., Builtjes, P.H.J., Thunis, P., Cuvelier, C., Bedogni, M., Bessagnet, B., Honoré,  
1128 C., Moussiopoulos, N., Pirovano, G., Schaap, M., 2007. Evaluation and  
1129 intercomparison of Ozone and PM10 simulations by several chemistry transport  
1130 models over four European cities within the CityDelta project. *Atmospheric*  
1131 *Environment* 41, 173–188. <https://doi.org/10.1016/j.atmosenv.2006.07.039>

1132 Venter, Z.S., Aunan, K., Chowdhury, S., Lelieveld, J., 2020. COVID-19 lockdowns cause  
1133 global air pollution declines. *PNAS* 117, 18984–18990.  
1134 <https://doi.org/10.1073/pnas.2006853117>

1135 Wang, C., Horby, P.W., Hayden, F.G., Gao, G.F., 2020a. A novel coronavirus outbreak of  
1136 global health concern. *The Lancet* 395, 470–473. [https://doi.org/10.1016/S0140-](https://doi.org/10.1016/S0140-6736(20)30185-9)  
1137 [6736\(20\)30185-9](https://doi.org/10.1016/S0140-6736(20)30185-9)

1138 Wang, J., Ogawa, S., 2015. Effects of Meteorological Conditions on PM2.5 Concentrations in  
1139 Nagasaki, Japan. *Int J Environ Res Public Health* 12, 9089–9101.  
1140 <https://doi.org/10.3390/ijerph120809089>

1141 Wang, J., Yu, A., Yang, L., Fang, C., 2019. Research on Organic Carbon and Elemental  
1142 Carbon Distribution Characteristics and Their Influence on Fine Particulate Matter  
1143 (PM2.5) in Changchun City. *Environments* 6, 21.  
1144 <https://doi.org/10.3390/environments6020021>

1145 Wang, M., Jiang, A., Gong, L., Luo, L., Guo, W., Li, Chuyi, Zheng, J., Li, Chaoyong, Yang,  
1146 B., Zeng, J., Chen, Y., Zheng, K., Li, H., 2020b. Temperature significant change  
1147 COVID-19 Transmission in 429 cities. *medRxiv* 2020.02.22.20025791.  
1148 <https://doi.org/10.1101/2020.02.22.20025791>

1149 Wang, Q., Su, M., 2020. A preliminary assessment of the impact of COVID-19 on  
1150 environment – A case study of China. *Science of The Total Environment* 728,  
1151 138915. <https://doi.org/10.1016/j.scitotenv.2020.138915>

1152 Wang, Y., Wang, Yuyi, Chen, Y., Qin, Q., 2020c. Unique epidemiological and clinical  
1153 features of the emerging 2019 novel coronavirus pneumonia (COVID-19) implicate  
1154 special control measures. *Journal of Medical Virology* 92, 568–576.  
1155 <https://doi.org/10.1002/jmv.25748>

1156 White, M.P., Alcock, I., Grellier, J., Wheeler, B.W., Hartig, T., Warber, S.L., Bone, A.,  
1157 Depledge, M.H., Fleming, L.E., 2019. Spending at least 120 minutes a week in nature  
1158 is associated with good health and wellbeing. *Scientific Reports* 9, 7730.  
1159 <https://doi.org/10.1038/s41598-019-44097-3>

1160 Winiger, P., Andersson, A., Eckhardt, S., Stohl, A., Gustafsson, Ö., 2016. The sources of  
1161 atmospheric black carbon at a European gateway to the Arctic. *Nature*  
1162 *Communications* 7, 12776. <https://doi.org/10.1038/ncomms12776>

1163 Wu, J.-Z., Ge, D.-D., Zhou, L.-F., Hou, L.-Y., Zhou, Y., Li, Q.-Y., 2018a. Effects of  
1164 particulate matter on allergic respiratory diseases. *Chronic Diseases and Translational*  
1165 *Medicine, Special Issue: Air Pollution and Chronic Respiratory Diseases* 4, 95–102.  
1166 <https://doi.org/10.1016/j.cdtm.2018.04.001>

1167 Wu, X., Nethery, R.C., Sabath, M.B., Braun, D., Dominici, F., 2020. Air pollution and  
1168 COVID-19 mortality in the United States: Strengths and limitations of an ecological  
1169 regression analysis. *Science Advances* 6, eabd4049.  
1170 <https://doi.org/10.1126/sciadv.abd4049>

1171 Wu, Y., Liu, J., Zhai, J., Cong, L., Wang, Y., Ma, W., Zhang, Z., Li, C., 2018b. Comparison  
1172 of dry and wet deposition of particulate matter in near-surface waters during summer.  
1173 *PLOS ONE* 13, e0199241. <https://doi.org/10.1371/journal.pone.0199241>



- 1174 Wu, Z., McGoogan, J.M., 2020. Characteristics of and Important Lessons From the  
1175 Coronavirus Disease 2019 (COVID-19) Outbreak in China: Summary of a Report of  
1176 72 314 Cases From the Chinese Center for Disease Control and Prevention. *JAMA*  
1177 323, 1239. <https://doi.org/10.1001/jama.2020.2648>
- 1178 Xie, J., Zhu, Y., 2020. Association between ambient temperature and COVID-19 infection in  
1179 122 cities from China. *Science of The Total Environment* 724, 138201.  
1180 <https://doi.org/10.1016/j.scitotenv.2020.138201>
- 1181 Xing, Y.-F., Xu, Y.-H., Shi, M.-H., Lian, Y.-X., 2016. The impact of PM2.5 on the human  
1182 respiratory system. *J Thorac Dis* 8, E69–E74. [https://doi.org/10.3978/j.issn.2072-](https://doi.org/10.3978/j.issn.2072-1439.2016.01.19)  
1183 [1439.2016.01.19](https://doi.org/10.3978/j.issn.2072-1439.2016.01.19)
- 1184 Xu, H., Guinot, B., Ho, S.S.H., Li, Y., Cao, J., Shen, Z., Niu, X., Zhao, Z., Liu, S., Lei, Y.,  
1185 Zhang, Q., Sun, J., 2018a. Evaluation on exposures to particulate matter at a junior  
1186 secondary school: a comprehensive study on health risks and effective inflammatory  
1187 responses in Northwestern China. *Environ Geochem Health* 40, 849–863.  
1188 <https://doi.org/10.1007/s10653-017-0030-7>
- 1189 Xu, X., Liu, X., Ma, S., Xu, Ya, Xu, Ying, Guo, X., Li, D., 2018b. Association of Melatonin  
1190 Production with Seasonal Changes, Low Temperature, and Immuno-Responses in  
1191 Hamsters. *Molecules* 23. <https://doi.org/10.3390/molecules23030703>
- 1192 Yang, G., Liu, Y., Li, X., 2020a. Spatiotemporal distribution of ground-level ozone in China  
1193 at a city level. *Scientific Reports* 10, 7229. [https://doi.org/10.1038/s41598-020-](https://doi.org/10.1038/s41598-020-64111-3)  
1194 [64111-3](https://doi.org/10.1038/s41598-020-64111-3)
- 1195 Yang, X., Yang, Q., Wang, Y., Wu, Y., Xu, J., Yu, Y., Shang, Y., 2020b. Thrombocytopenia  
1196 and its association with mortality in patients with COVID-19. *Journal of Thrombosis*  
1197 *and Haemostasis* 18, 1469–1472. <https://doi.org/10.1111/jth.14848>
- 1198 Yekkehkhany, B., Safari, A., Homayouni, S., Hasanlou, M., 2014. A Comparison Study of  
1199 Different Kernel Functions for Svm-Based Classification of Multi-Temporal  
1200 Polarimetry Sar Data. *Int. Arch. Photogramm. Remote Sens. Spatial Inf. Sci.* XL-  
1201 2/W3, 281–285. <https://doi.org/10.5194/isprsarchives-XL-2-W3-281-2014>
- 1202 Yuan, J., Wu, Y., Jing, W., Liu, J., Du, M., Wang, Y., Liu, M., 2021. Non-linear correlation  
1203 between daily new cases of COVID-19 and meteorological factors in 127 countries.  
1204 *Environ Res* 193, 110521. <https://doi.org/10.1016/j.envres.2020.110521>
- 1205 Zhang, D., Li, Y., Chen, Q., Jiang, Y., Chu, C., Ding, Y., Yu, Y., Fan, Y., Shi, J., Luo, Y.,  
1206 Zhou, W., 2019b. The relationship between air quality and respiratory pathogens  
1207 among children in Suzhou City. *Italian Journal of Pediatrics* 45, 123.  
1208 <https://doi.org/10.1186/s13052-019-0702-2>
- 1209 Zhang, H., Wang, Y., Hu, J., Ying, Q., Hu, X.-M., 2015. Relationships between  
1210 meteorological parameters and criteria air pollutants in three megacities in China.  
1211 *Environmental Research* 140, 242–254. <https://doi.org/10.1016/j.envres.2015.04.004>
- 1212 Zhang, H., Wang, Z., 2011. Advances in the Study of Black Carbon Effects on Climate.  
1213 *Advances in Climate Change Research* 2, 23–30.  
1214 <https://doi.org/10.3724/SP.J.1248.2011.00023>
- 1215 Zhang, J., Chen, Q., Wang, Q., Ding, Z., Sun, H., Xu, Y., 2019c. The acute health effects of  
1216 ozone and PM2.5 on daily cardiovascular disease mortality: A multi-center time series  
1217 study in China. *Ecotoxicology and Environmental Safety* 174, 218–223.  
1218 <https://doi.org/10.1016/j.ecoenv.2019.02.085>
- 1219 Zhang, J. (Jim), Wei, Y., Fang, Z., 2019a. Ozone Pollution: A Major Health Hazard  
1220 Worldwide. *Front. Immunol.* 10. <https://doi.org/10.3389/fimmu.2019.02518>
- 1221 Zhang, L., Michelangeli, D.V., Taylor, P.A., 2004. Numerical studies of aerosol scavenging  
1222 by low-level, warm stratiform clouds and precipitation. *Atmospheric Environment* 38,  
1223 4653–4665. <https://doi.org/10.1016/j.atmosenv.2004.05.042>

1224 Zhang, Z., Xu, X., Qiao, L., Gong, D., Kim, S.-J., Wang, Y., Mao, R., 2018. Numerical  
1225 simulations of the effects of regional topography on haze pollution in Beijing. *Sci Rep*  
1226 8, 5504. <https://doi.org/10.1038/s41598-018-23880-8>  
1227 Zhao, Y., Richardson, B., Takle, E., Chai, L., Schmitt, D., Xin, H., 2019. Airborne  
1228 transmission may have played a role in the spread of 2015 highly pathogenic avian  
1229 influenza outbreaks in the United States. *Scientific Reports* 9, 11755.  
1230 <https://doi.org/10.1038/s41598-019-47788-z>  
1231 Zheng, Z., Xu, G., Li, Q., Chen, C., Li, J., 2019. Effect of precipitation on reducing  
1232 atmospheric pollutant over Beijing. *Atmospheric Pollution Research* 10, 1443–1453.  
1233 <https://doi.org/10.1016/j.apr.2019.04.001>  
1234 Zhu, N., Zhang, D., Wang, W., Li, X., Yang, B., Song, J., Zhao, X., Huang, B., Shi, W., Lu,  
1235 R., Niu, P., Zhan, F., Ma, X., Wang, D., Xu, W., Wu, G., Gao, G.F., Tan, W., 2020a.  
1236 A Novel Coronavirus from Patients with Pneumonia in China, 2019. *N Engl J Med*  
1237 382, 727–733. <https://doi.org/10.1056/NEJMoa2001017>  
1238 Zhu, Y., Xie, J., Huang, F., Cao, L., 2020b. Association between short-term exposure to air  
1239 pollution and COVID-19 infection: Evidence from China. *Sci Total Environ* 727,  
1240 138704. <https://doi.org/10.1016/j.scitotenv.2020.138704>  
1241 Zoran, M.A., Savastru, R.S., Savastru, D.M., Tautan, M.N., 2020. Assessing the relationship  
1242 between ground levels of ozone (O<sub>3</sub>) and nitrogen dioxide (NO<sub>2</sub>) with coronavirus  
1243 (COVID-19) in Milan, Italy. *Science of The Total Environment* 740, 140005.  
1244 <https://doi.org/10.1016/j.scitotenv.2020.140005>  
1245 Zu, Z.Y., Jiang, M.D., Xu, P.P., Chen, W., Ni, Q.Q., Lu, G.M., Zhang, L.J., 2020.  
1246 Coronavirus Disease 2019 (COVID-19): A Perspective from China. *Radiology*  
1247 200490. <https://doi.org/10.1148/radiol.2020200490>  
1248
